# Supplementary material for: Glycolytic reliance promotes anabolism in photoreceptors
Source: eLife. 2017 Jun 9;6:e25946. doi: 10.7554/eLife.25946 (PMC5499945; doi:10.7554/eLife.25946)
Supplement: Figure 1—source data 1. — DOI: http://dx.doi.org/10.7554/eLife.25946.004 [file elife-25946-fig1-data1.xlsx]

## Sheet: Figure 1A
Control	Oxamate
1476.67	522
1033.33	709.5
1333.33	432
1285	612
1130

## Sheet: Figure 1B
	Control	Control	Control	Control	Control	Control	Control	Control	Oxamate	Oxamate	Oxamate	Oxamate	Oxamate	Oxamate	Oxamate	Oxamate
Untreated	103.683	95.4117	112.119	118.776	92.79	84.2183	104.753		93.21	97.843	127.267	116.487	87.1731	116.212	104.81	91.481
NaN3	67.241	52.864	48.3719	53.896	64.218	55.96	32.249	57.184	31.811	47.2498	27.849	23.1168	18.2191	24.29	36.33	26.7713

## Sheet: Figure 1E
DMSO	FX11
1476.67	321.333
1033.33	427.667
1333.33	518.333
1285	359.333
1130	402.333
	374.333

## Sheet: Figure 1F
	DMSO	DMSO	DMSO	DMSO	DMSO	DMSO	DMSO	DMSO	DMSO	FX11	FX11	FX11	FX11	FX11	FX11	FX11	FX11	FX11
Untreated	107.84	103.214	97.249	92.811	113.107	91.3	84.31	104.287		101.49	84.86	79.418	95.8	81.811	73.2	105.87	93.8
NaN3	42.79	56.814	64.229	48.82	64.993	52.3	37.241	43.816	55.19	14.81	24.82	18.814	14.84	16.88	10.122	11.687

## Sheet: Figure 1G
Bl6/J	LDHA fl/fl	Rod-cre/+	Rod-cre> LDHA fl/fl	Rod-cre> LDHA fl/+
1632.67	1658.33	1798.33	864.333	1548.33
1781.33	1811.33	1681.67	551.667	1719.67
1821.33	1786.33	1387.33	1033.67	1542.33
1874.67	1519.67	1285.67	1354.64	1678.67
1811.33	1714.33	1587.67	1106.67	1798.33
1809.67	1843.67	1716.33	664.333	1817.67
1719.67	1719.33	1669.33	718.667	1643.67
1802.33	1822.67	1764.33	1214.33	1467.67
			987.333
			909.667
			787.667
			918.333
			847.667
			544.333
			1014.67
			884.333
