# Supplementary material for: Glycolytic reliance promotes anabolism in photoreceptors
Source: eLife. 2017 Jun 9;6:e25946. doi: 10.7554/eLife.25946 (PMC5499945; doi:10.7554/eLife.25946)
Supplement: Figure 2—source data 1. — DOI: http://dx.doi.org/10.7554/eLife.25946.010 [file elife-25946-fig2-data1.xlsx]

## Sheet: Figure 2G
Control	Tigar
92.839	79.817
106.612	73.84
96.741	84.02
91.14	86.181
93.511	77.773
