# Supplementary material for: Glycolytic reliance promotes anabolism in photoreceptors
Source: eLife. 2017 Jun 9;6:e25946. doi: 10.7554/eLife.25946 (PMC5499945; doi:10.7554/eLife.25946)
Supplement: Figure 3—source data 1. — DOI: http://dx.doi.org/10.7554/eLife.25946.013 [file elife-25946-fig3-data1.xlsx]

## Sheet: Figure 3G
fl/fl	m2-/-
1784.07	1616.01
1849.54	1633.55
1911.74	1643.3
1856.12	1646.28
1736.81	1649.09
1711.8	1658.95
1811.32	1667.87
1816.48	1684.12
1837.21	1684.73
1731.28	1708.38
1877.79	1725.57
1876.52	1744.68
	1749.67
	1791.98
	1810.28
	1858.22
