# Supplementary material for: Glycolytic reliance promotes anabolism in photoreceptors
Source: eLife. 2017 Jun 9;6:e25946. doi: 10.7554/eLife.25946 (PMC5499945; doi:10.7554/eLife.25946)
Supplement: Figure 4—source data 1. — DOI: http://dx.doi.org/10.7554/eLife.25946.021 [file elife-25946-fig4-data1.xlsx]

## Sheet: Figure 4F
	DMSO	PD173074_5Î¼M	PD173074_20uM	TKI258_5uM
	1476.67	576.667	260	521.667
	1033.33	693.333	276.667	420
	1333.33	768.333	268.333	455
	1285	713.333	116.667	463.333
	1130	646.667	163.333	491.667
	1247.33	436.667		421.667
		543.667
Average	1250.94	625.524	217	462.222

## Sheet: Figure 4G
	DMSO									Average	SD
Untreated	103.2	95.881	90.271	111.214	88.26	90.4	94.2			96.2037	8.27001
NaN3	43.881	51.275	44.21	61.392	40.817	37.097	48.24	64.824	55.26	49.6662	9.37215
	TKI									Average	SD
Untreated	87.826	74.221	78.639	80.401	83.43	68.3	88.68	85.21	71.414	79.7912	7.25538
NaN3	22.1	17.757	11.4	14.293	10.049	24.634	15.824	9.017	18.21	15.9204	5.33797

## Sheet: Figure 4H
	Untreated	DMSO	Oxamate	PD173075	TKI258
	74.876	64.241	52.876	33.128	46.443
	72.818	73.216	58.214	35.29	32.815
	87.614	69.84	47.242	48.24	28.814
	78.8514	73.93	51.448	24.67	37.19
Average	78.5399	70.3067	52.445	35.332	36.3155
SD	5.67011	3.82763	3.92213	8.44325	6.55471

## Sheet: Figure 4I
	Untreated	DMSO	Oxamate	PD173074	TKI258
	97.844	87.198	83.22	78.5	73.338
	90.221	82.79	93.2	82.42	83.842
	95.872	94.212	88.44	87.214	79.212
	88.423	83.84	94.811	81.84	91.03
	83.917	96.72	83.267	89.481	87.473
	94.218	91.8		85.913	81.838
Average	91.7492	89.4267	88.5876	84.228	82.7888
SD	5.19579	5.69119	5.41172	4.02817	6.2287

## Sheet: Figure 4K
		w/ RPE						w/ RPE
		Sample 1	Sample 2	Sample 3	Average	SD		Sample 1	Sample 2	Sample 3	Average	SD
	spry1	87.6606	74.7425	70.7107	77.7046	8.85468		54.3367	62.8507	62.8507	60.0127	4.0135
	spry2	84.0896	86.4537	77.3782	82.6405	4.70808		68.302	47.9632	47.9632	54.7428	9.58781
	spry4	73.7135	84.6745	85.2635	81.2172	6.50506		55.0953	60.7097	60.7097	58.8382	2.6467
	spred1	93.3033	84.6745	87.6606	88.5461	4.38202		48.971	56.6442	56.6442	54.0865	3.61717
	spred2	87.0551	72.1965	78.4584	79.2366	7.45981		61.9854	65.9754	65.9754	64.6454	1.88091
	dusp6	76.313	82.932	85.8565	81.7005	4.88952		47.6319	54.7147	54.7147	52.3538	3.33886
	rs1	82.3591	87.6606	94.6058	88.2085	6.14169		88.8843	85.2635	85.2635	86.4704	1.70685
	arr3	86.4537	85.8565	93.3033	88.5379	4.13778		92.0188	93.3033	93.3033	92.8751	0.605535

## Sheet: Figure 4L
	w/o RPE	w/ RPE	w/o RPE FGF2 added
	1746.5	2161.5	2499
	1661.5	1956.5	1946.5
	1711.5	1731.5	1714
	1856.5	1901.5	2221.5
	1731.5	1941.5	2259
	1736.5	2024	1969
	1811.5	1706.5	2226.5
	1816.5	2066.5	2201.5
	1876.5	1987.7
		2011.7
		2019.8
Average	1772.06	1955.34	2129.62
