# Supplementary figures and images for: Glycolytic reliance promotes anabolism in photoreceptors
Source: eLife journal article supplement (doi:10.7554/elife.25946), 2017-06-09

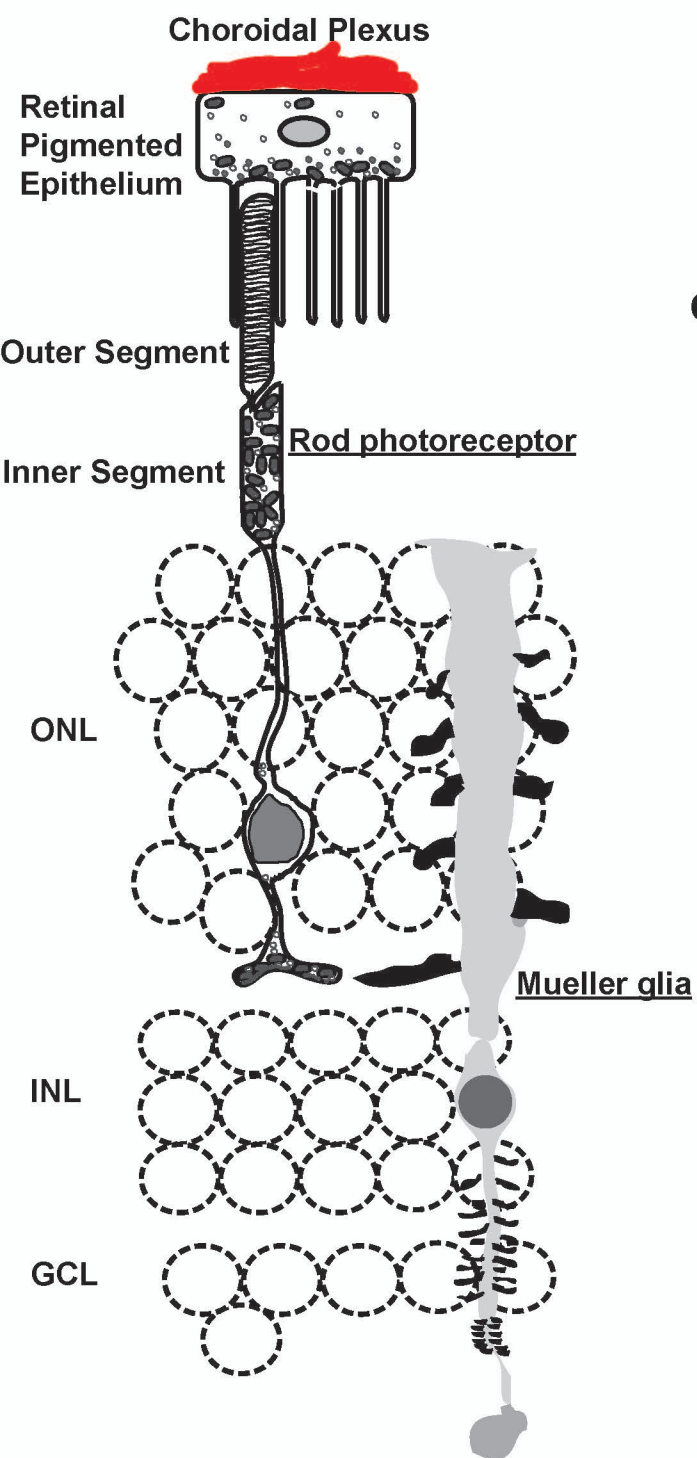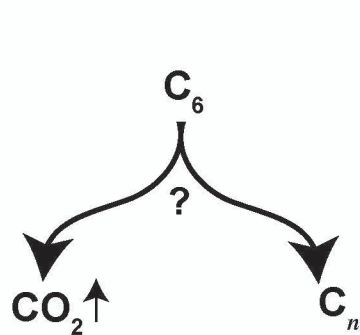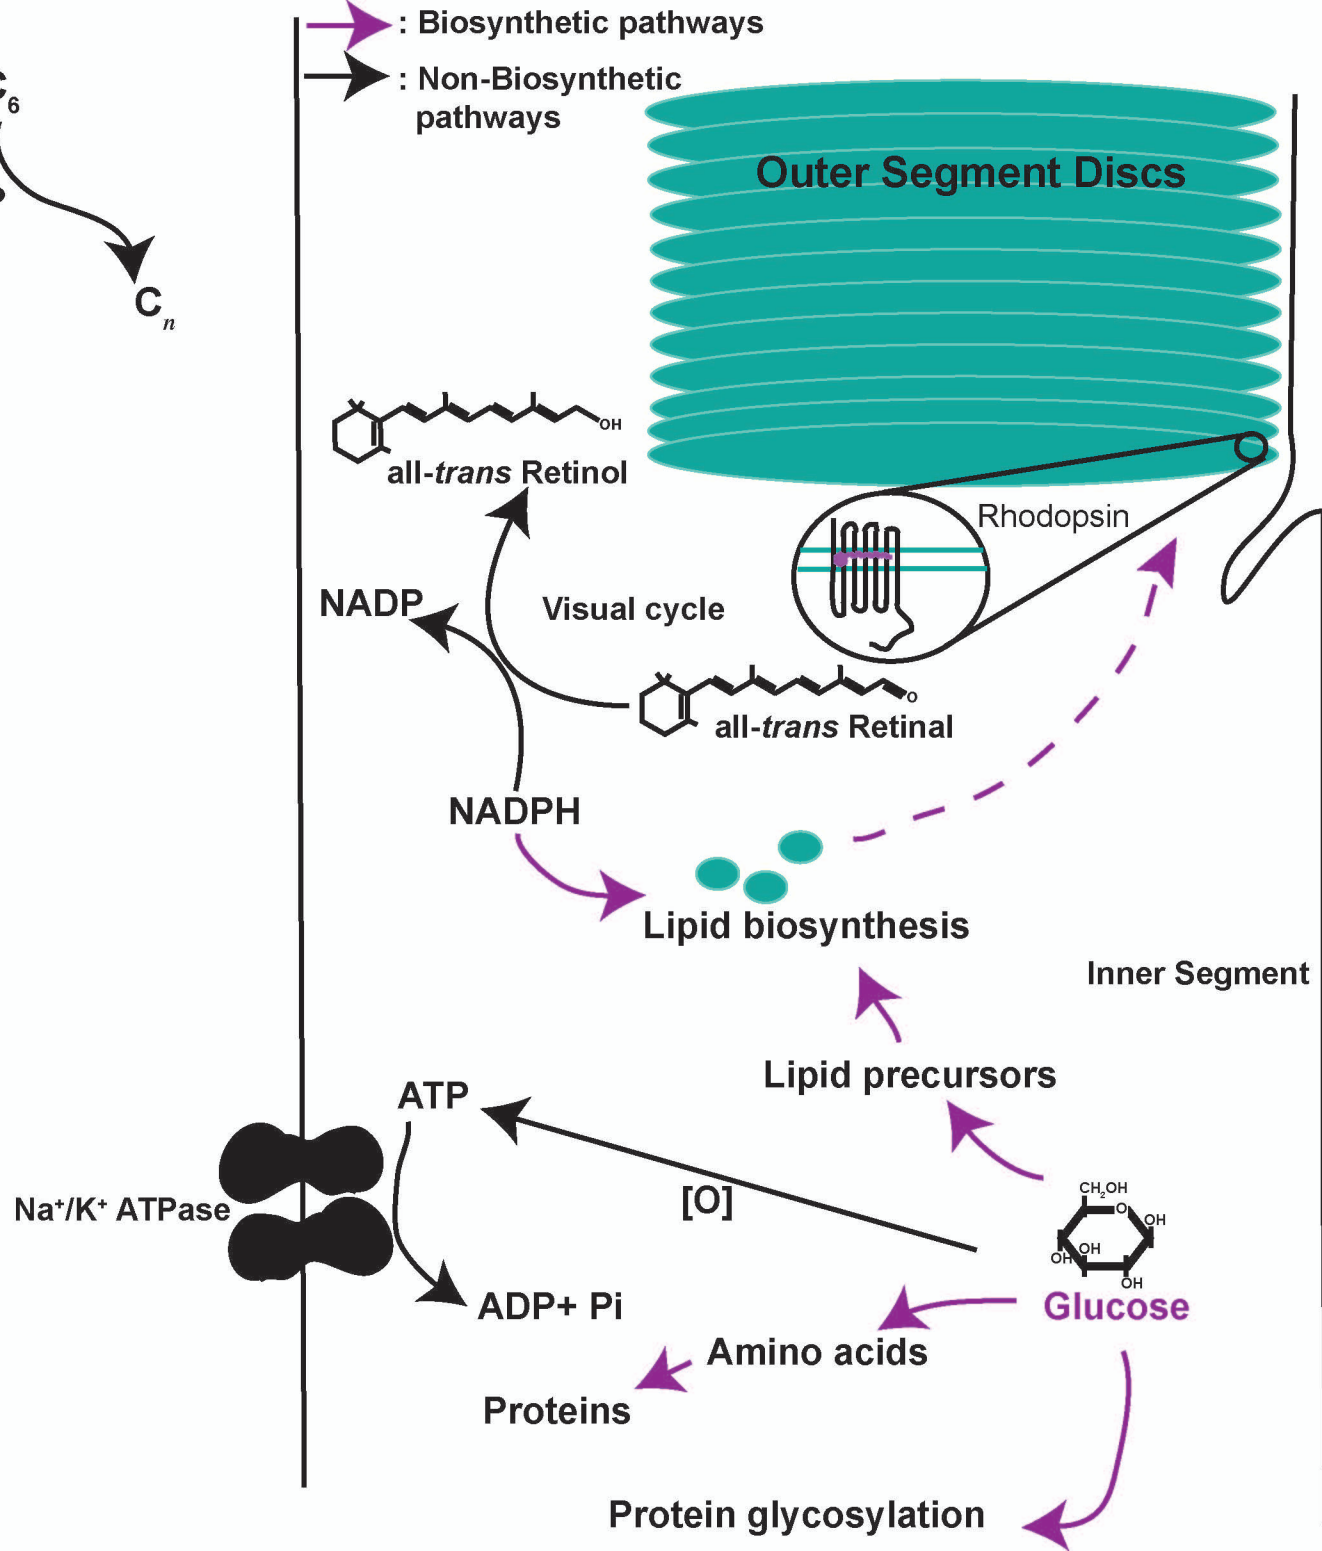

Supplement: supp [file elife_poa_e25946_Figure_1_figure_supplement_1.pdf › elife_poa_e25946_Figure_1_figure_supplement_1.pdf]

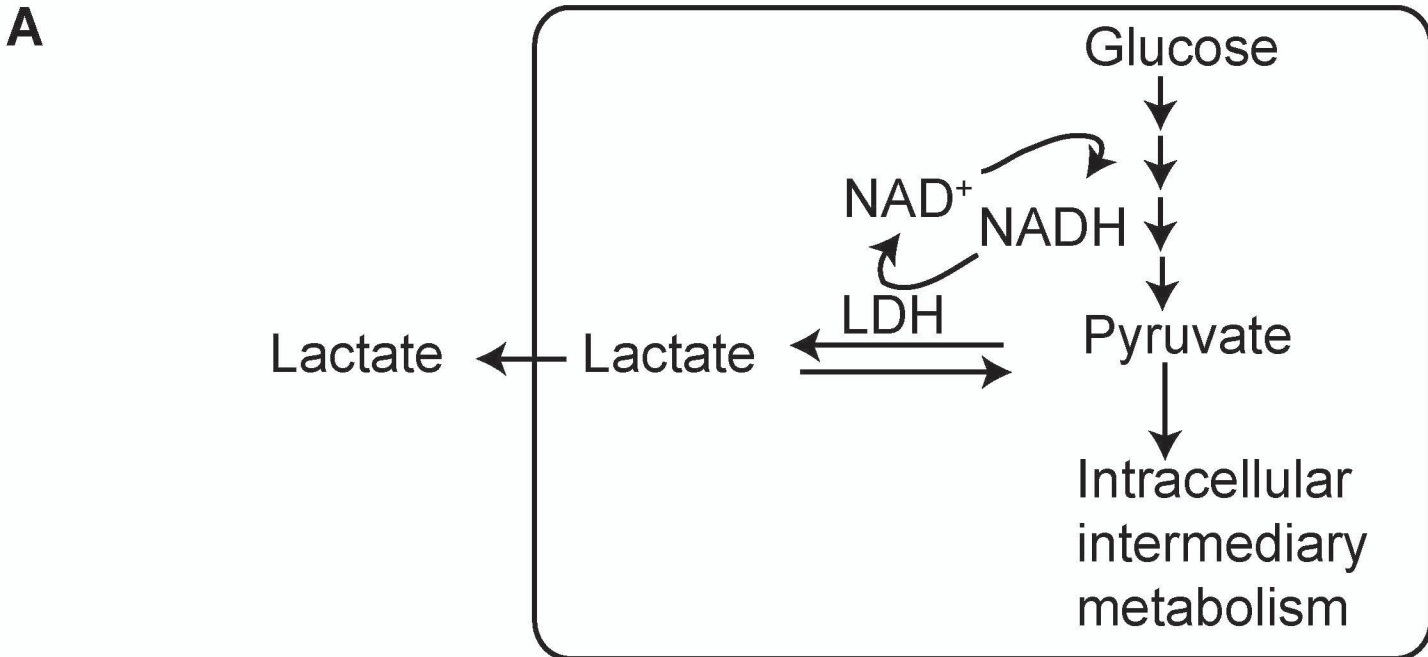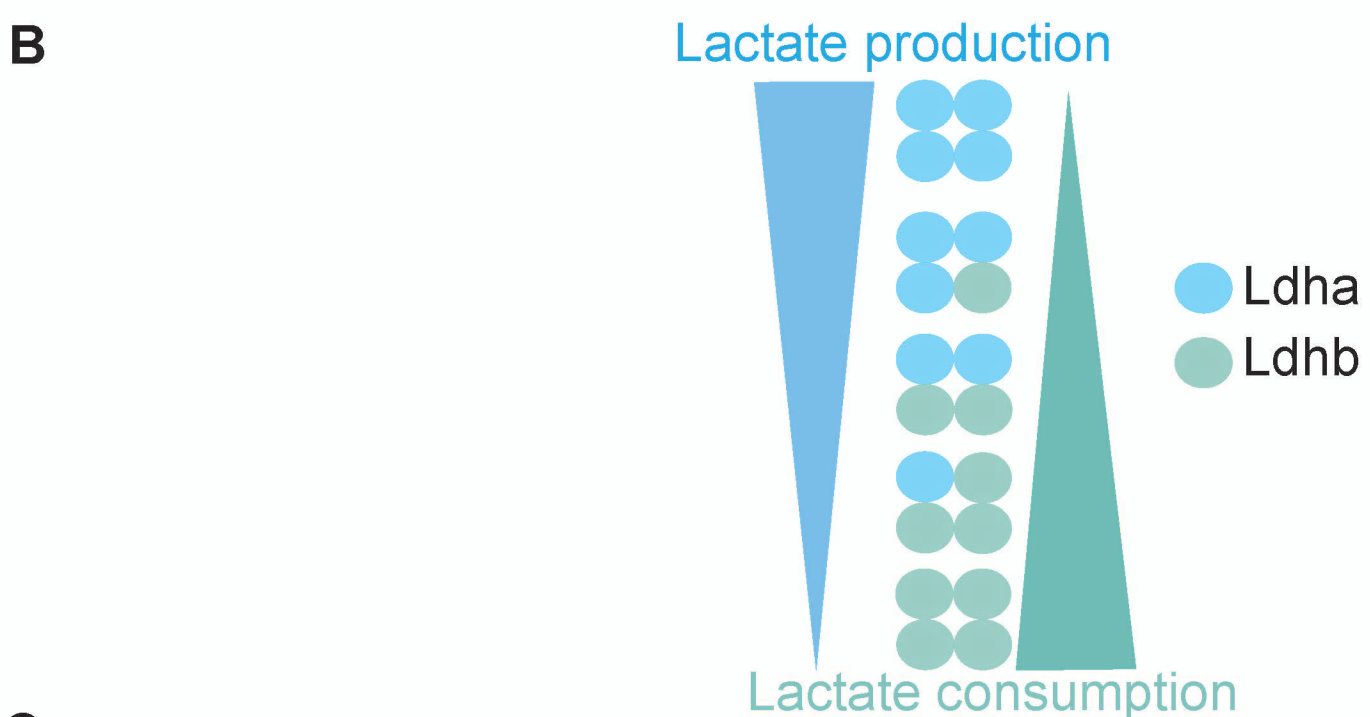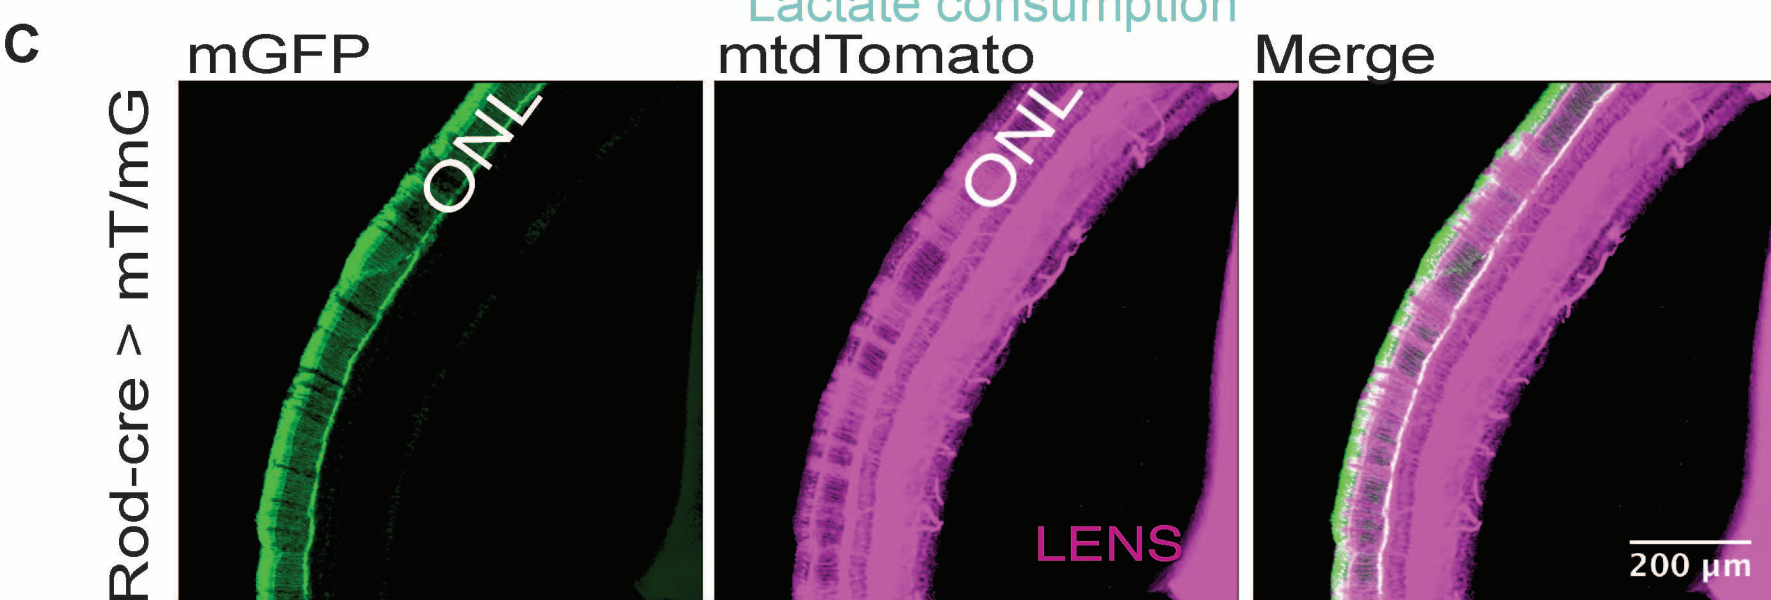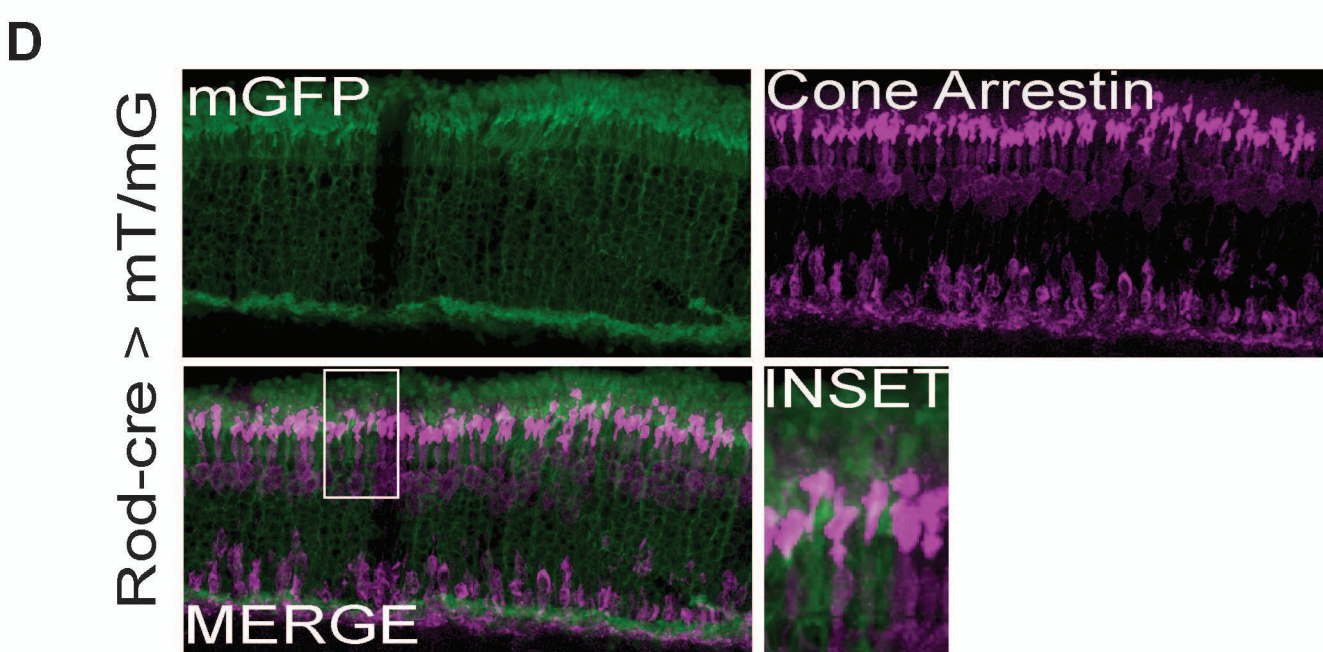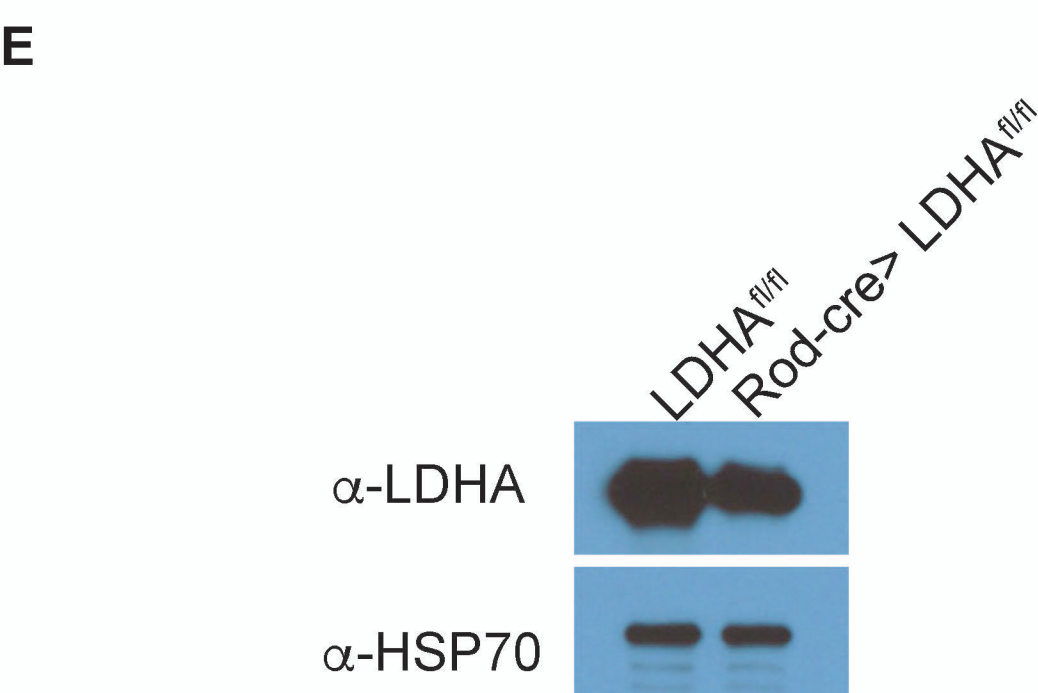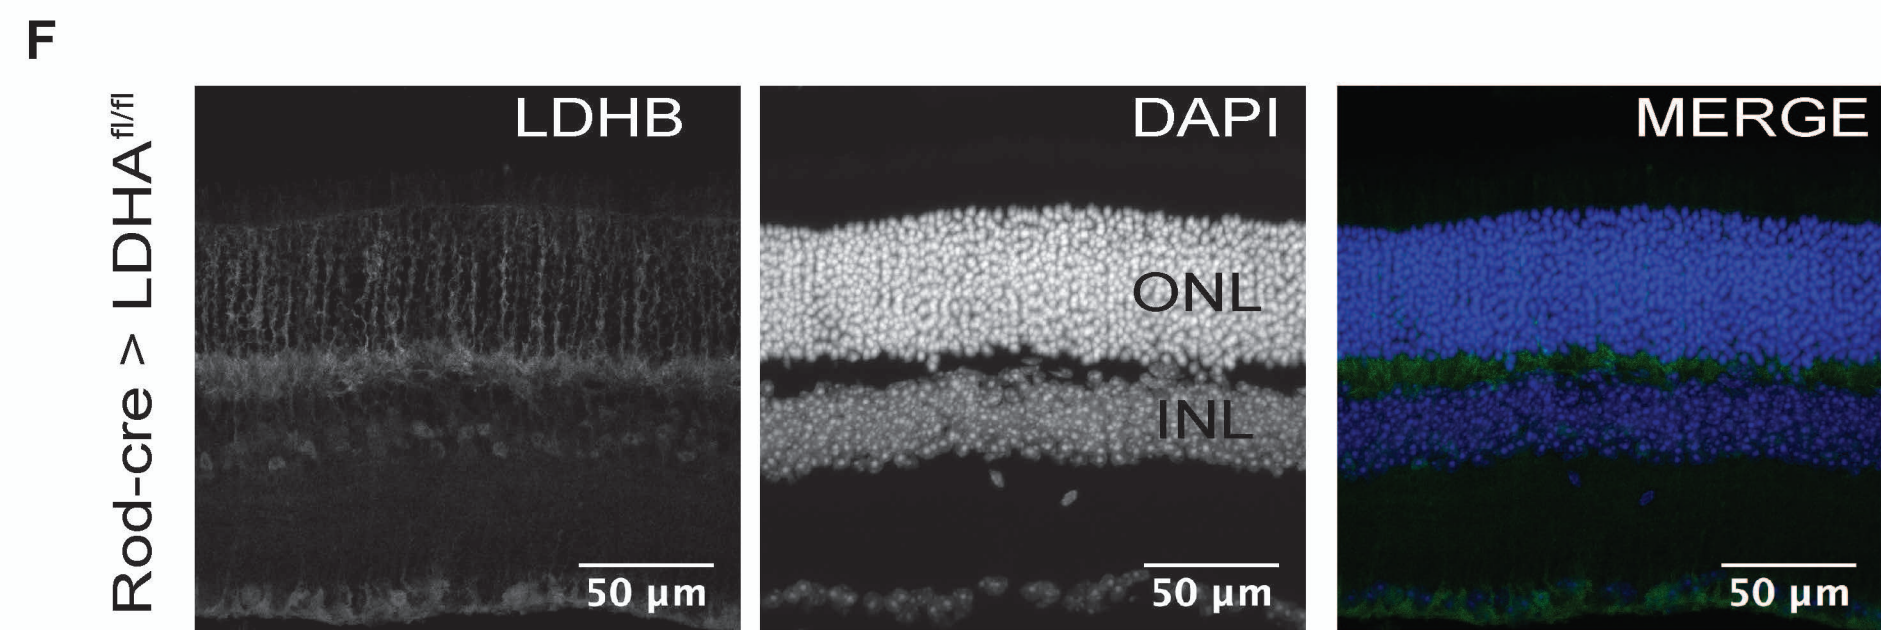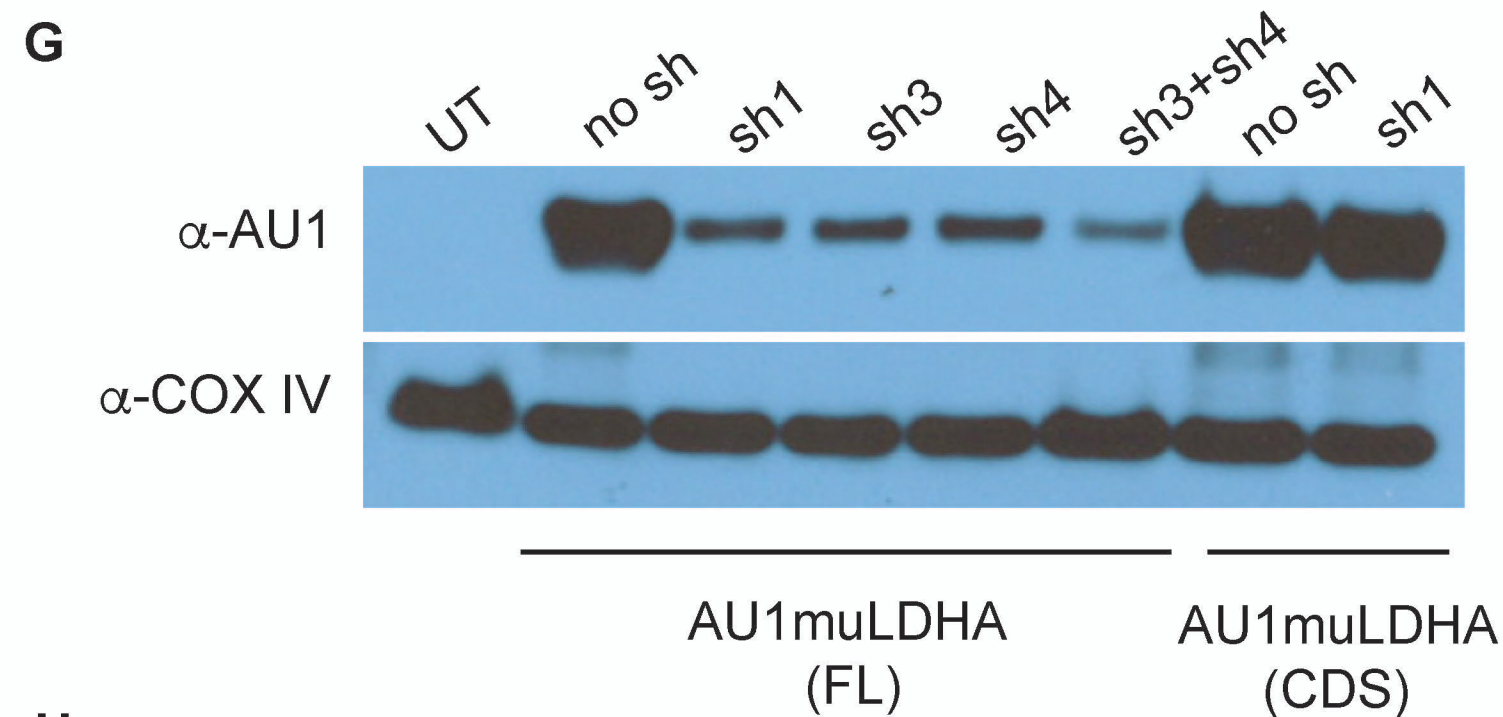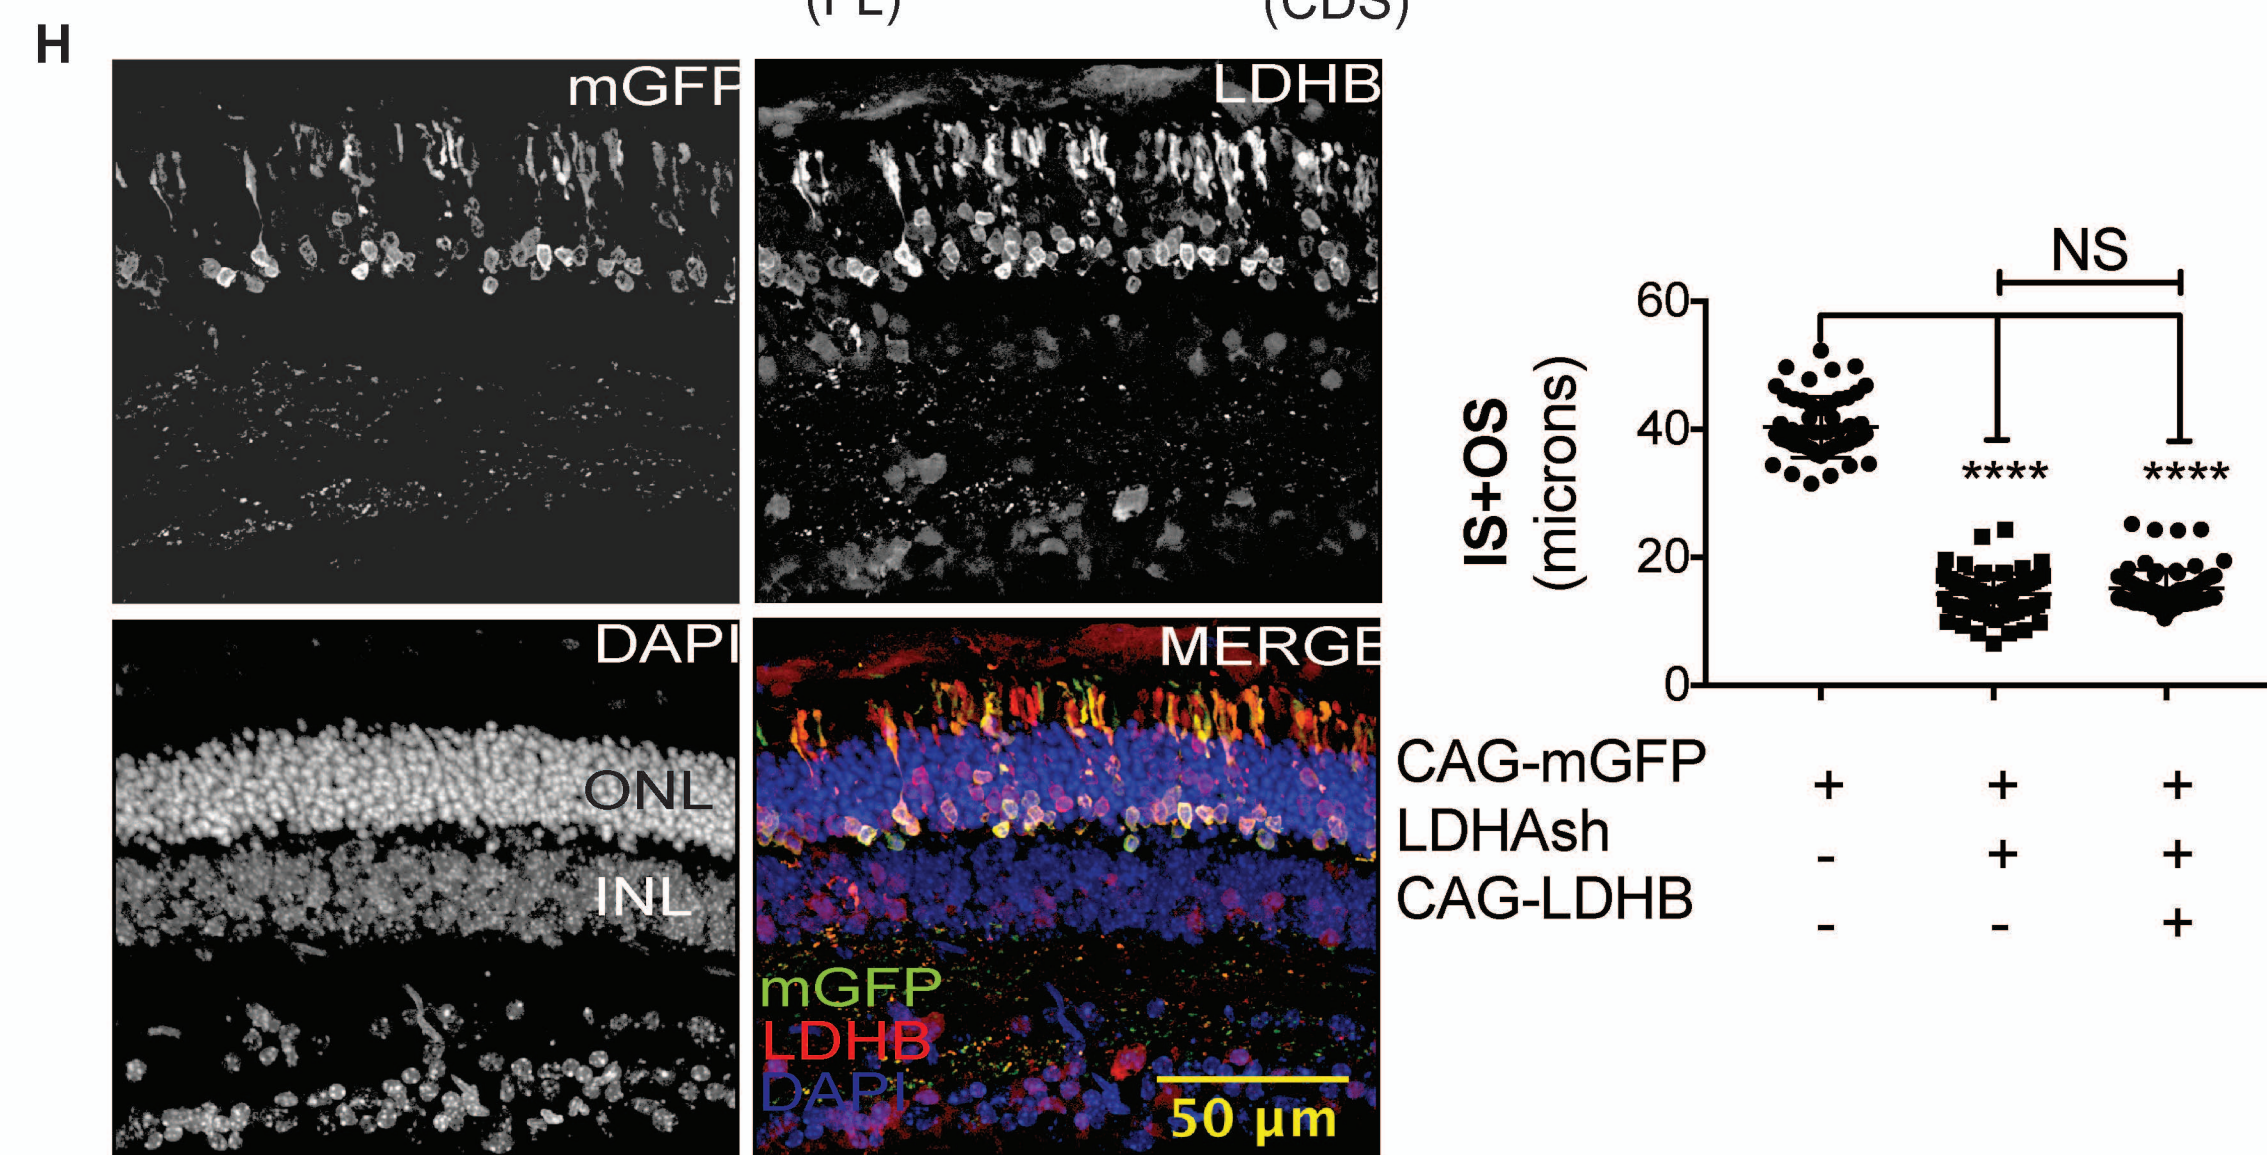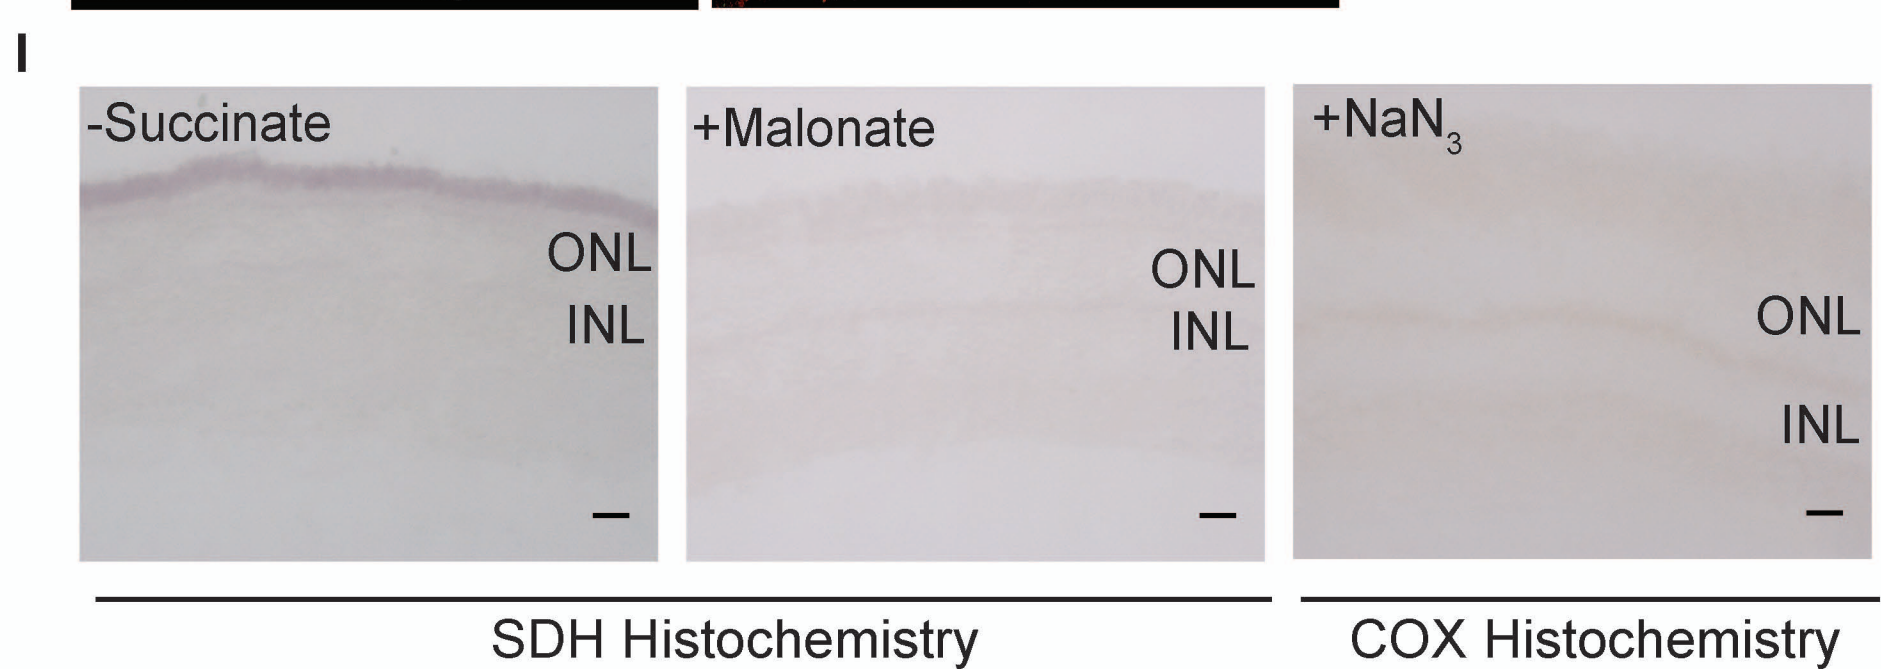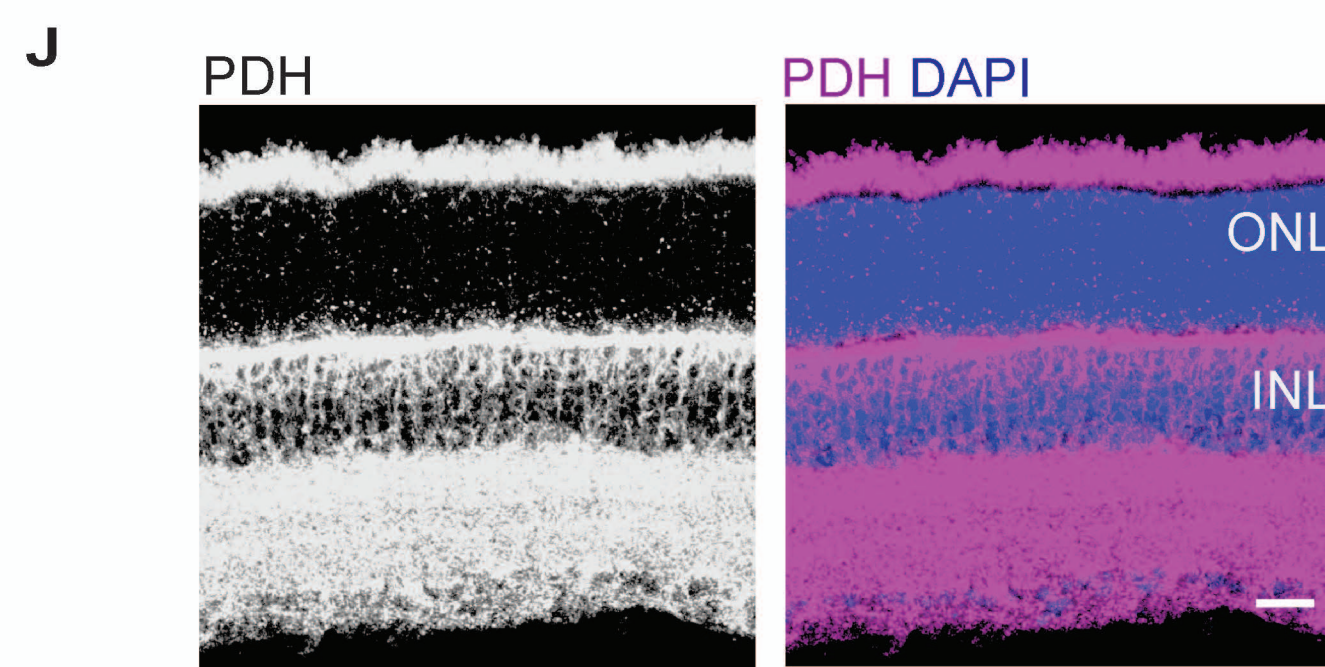

Supplement: supp [file elife_poa_e25946_Figure_1_figure_supplement_2.pdf › elife_poa_e25946_Figure_1_figure_supplement_2.pdf]

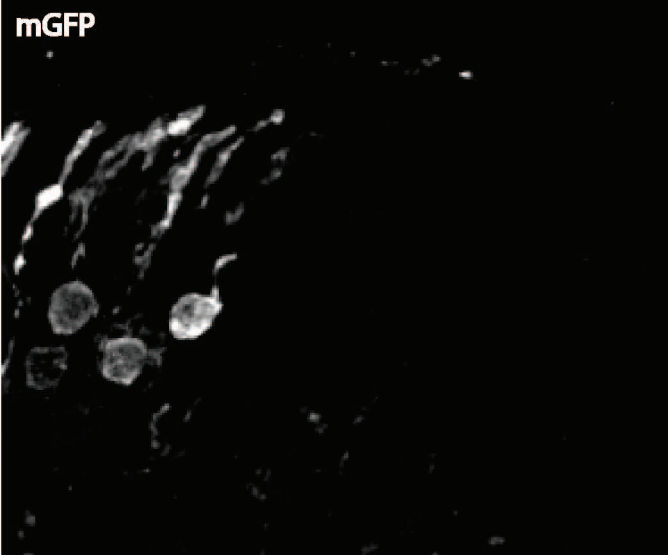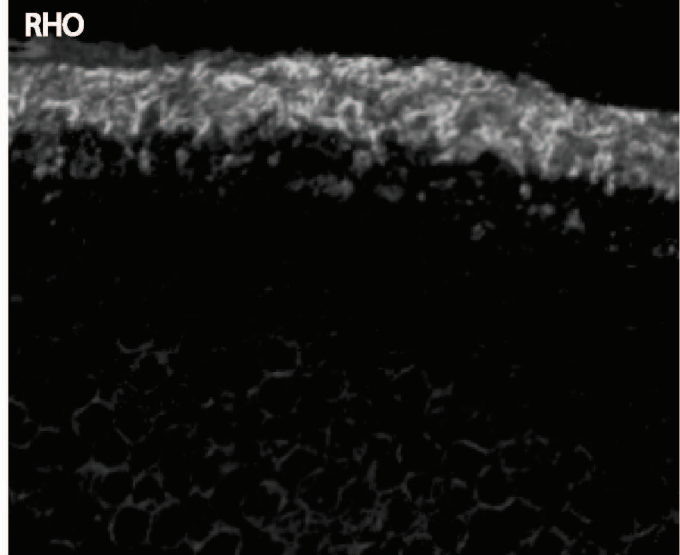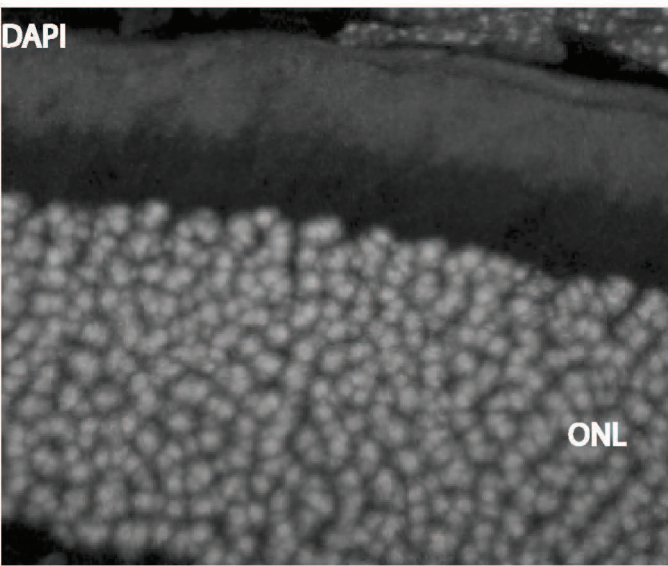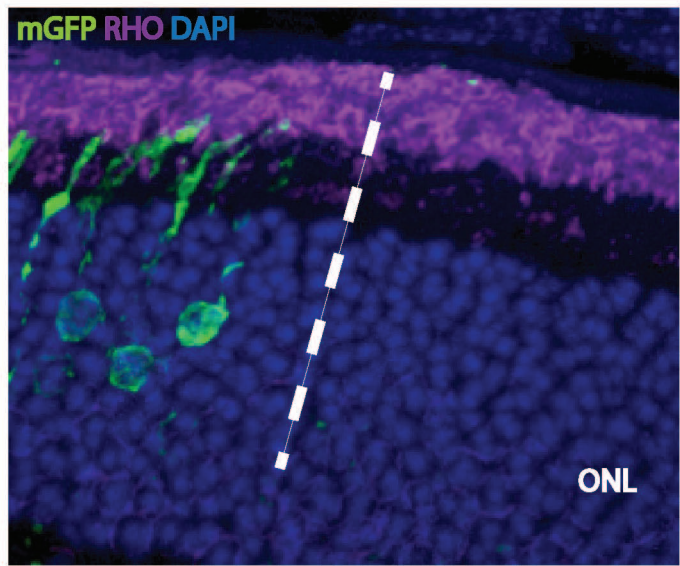

Supplement: supp [file elife_poa_e25946_Figure_1_figure_supplement_3.pdf › elife_poa_e25946_Figure_1_figure_supplement_3.pdf]

Wild type

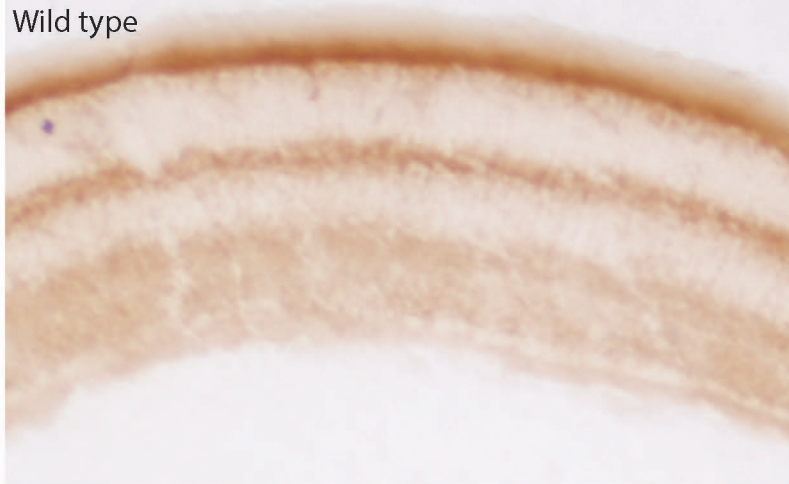

Rod-cre> LDHA<sup>FL/+</sup>

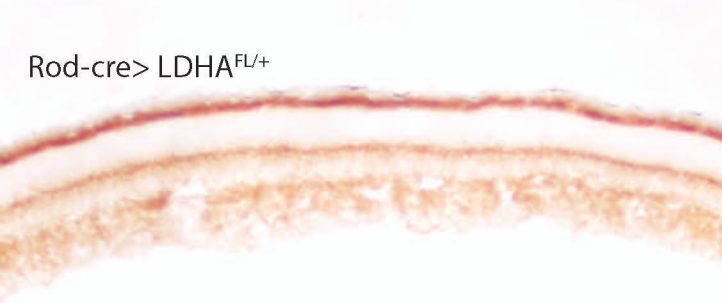

Rod-cre> LDHA<sup>FL/FL</sup>

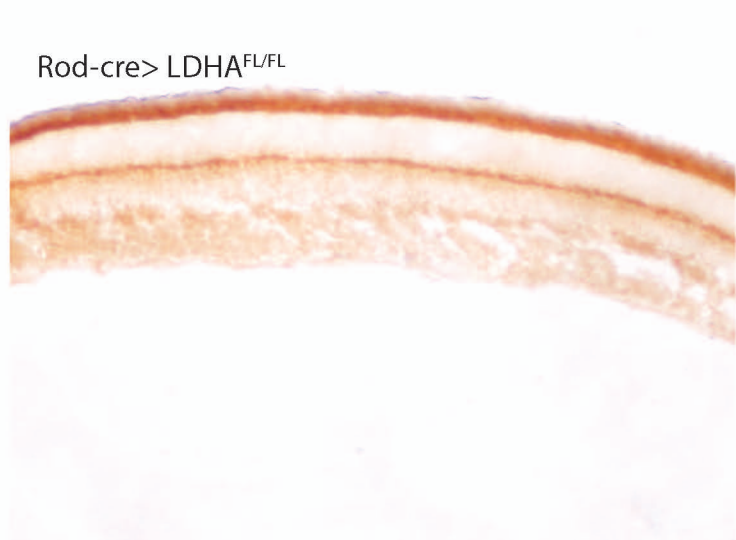

Supplement: supp [file elife_poa_e25946_Figure_1_figure_supplement_4.pdf › elife_poa_e25946_Figure_1_figure_supplement_4.pdf]

**A**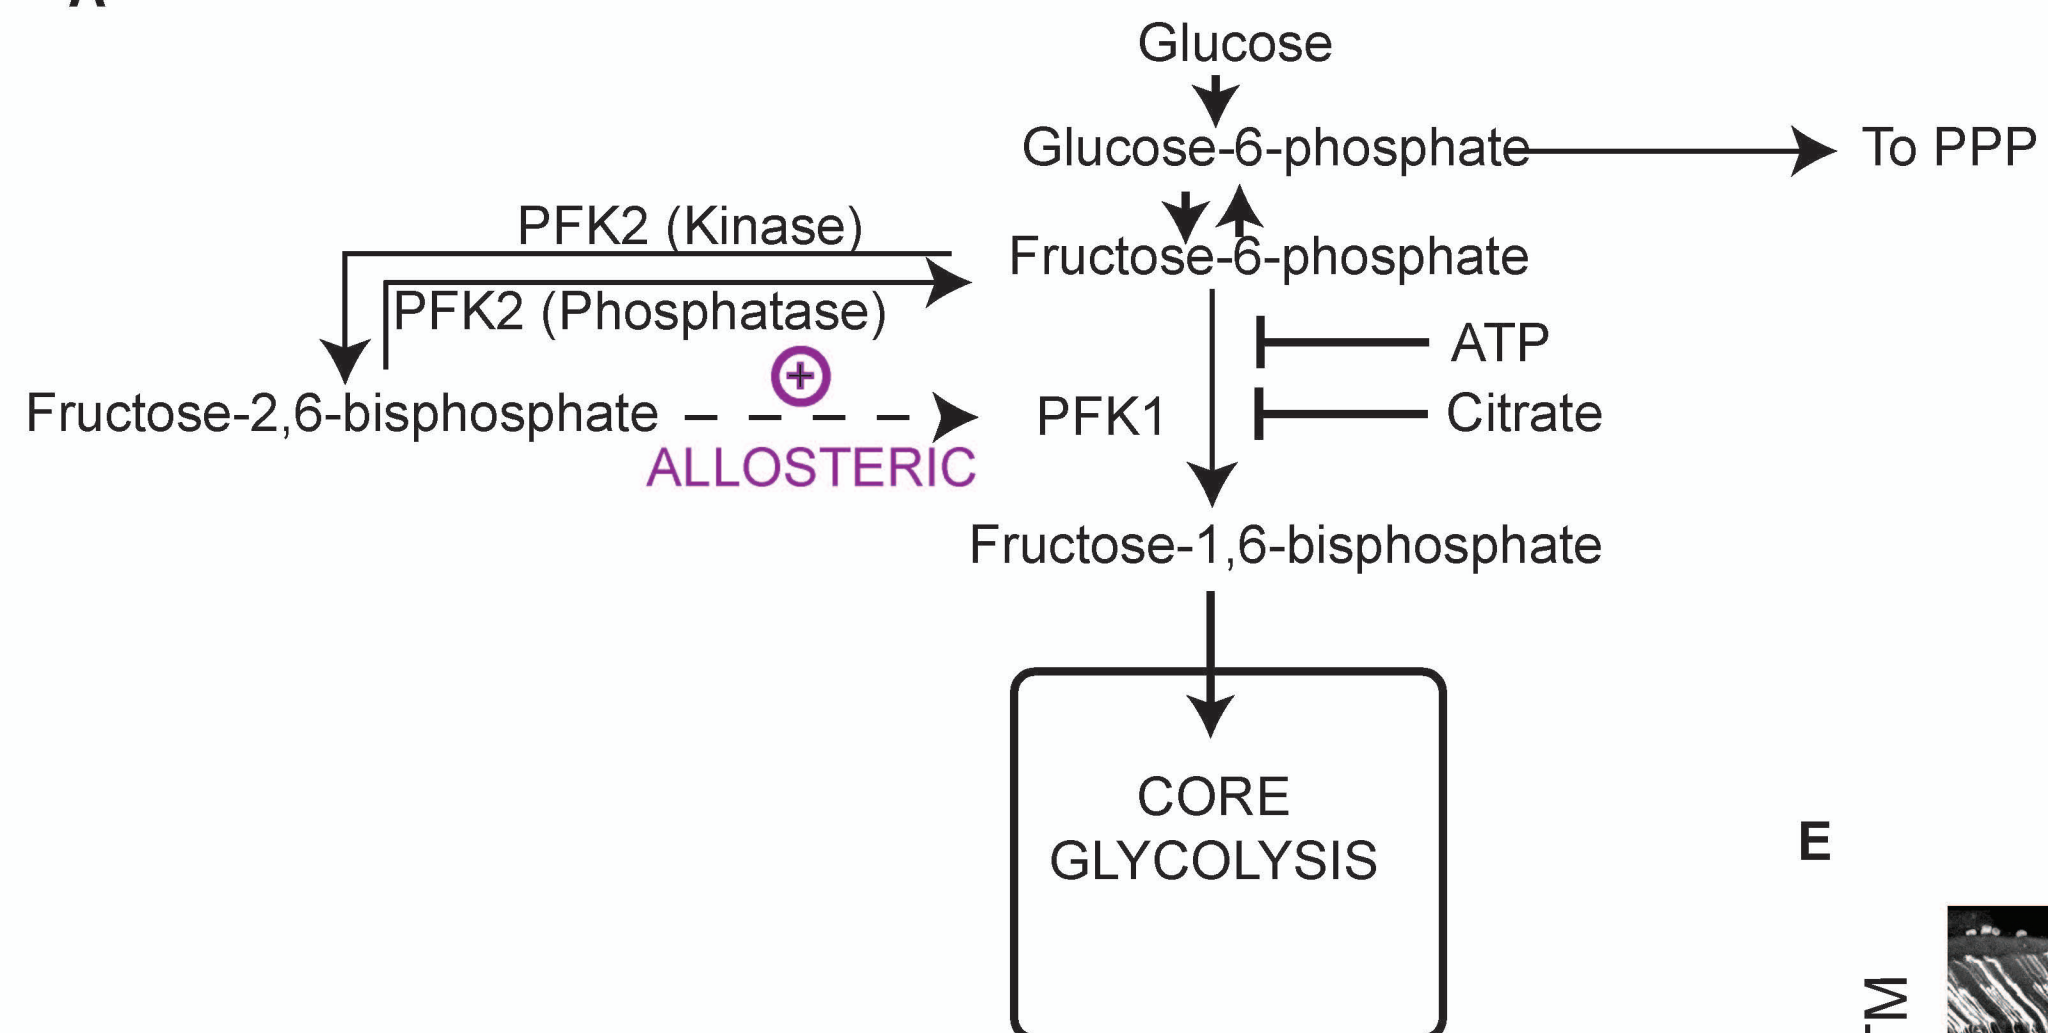**B**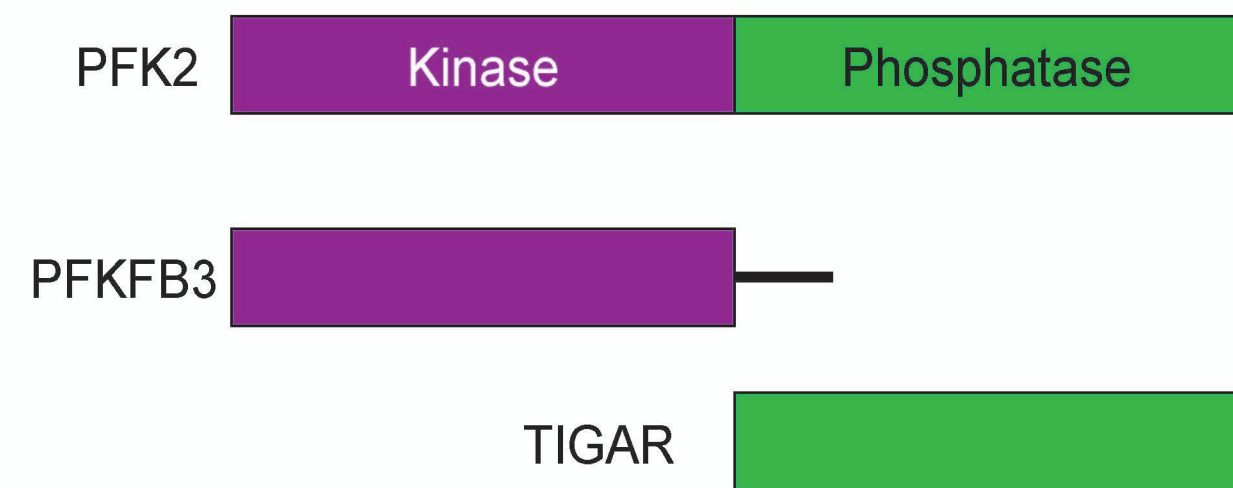**C**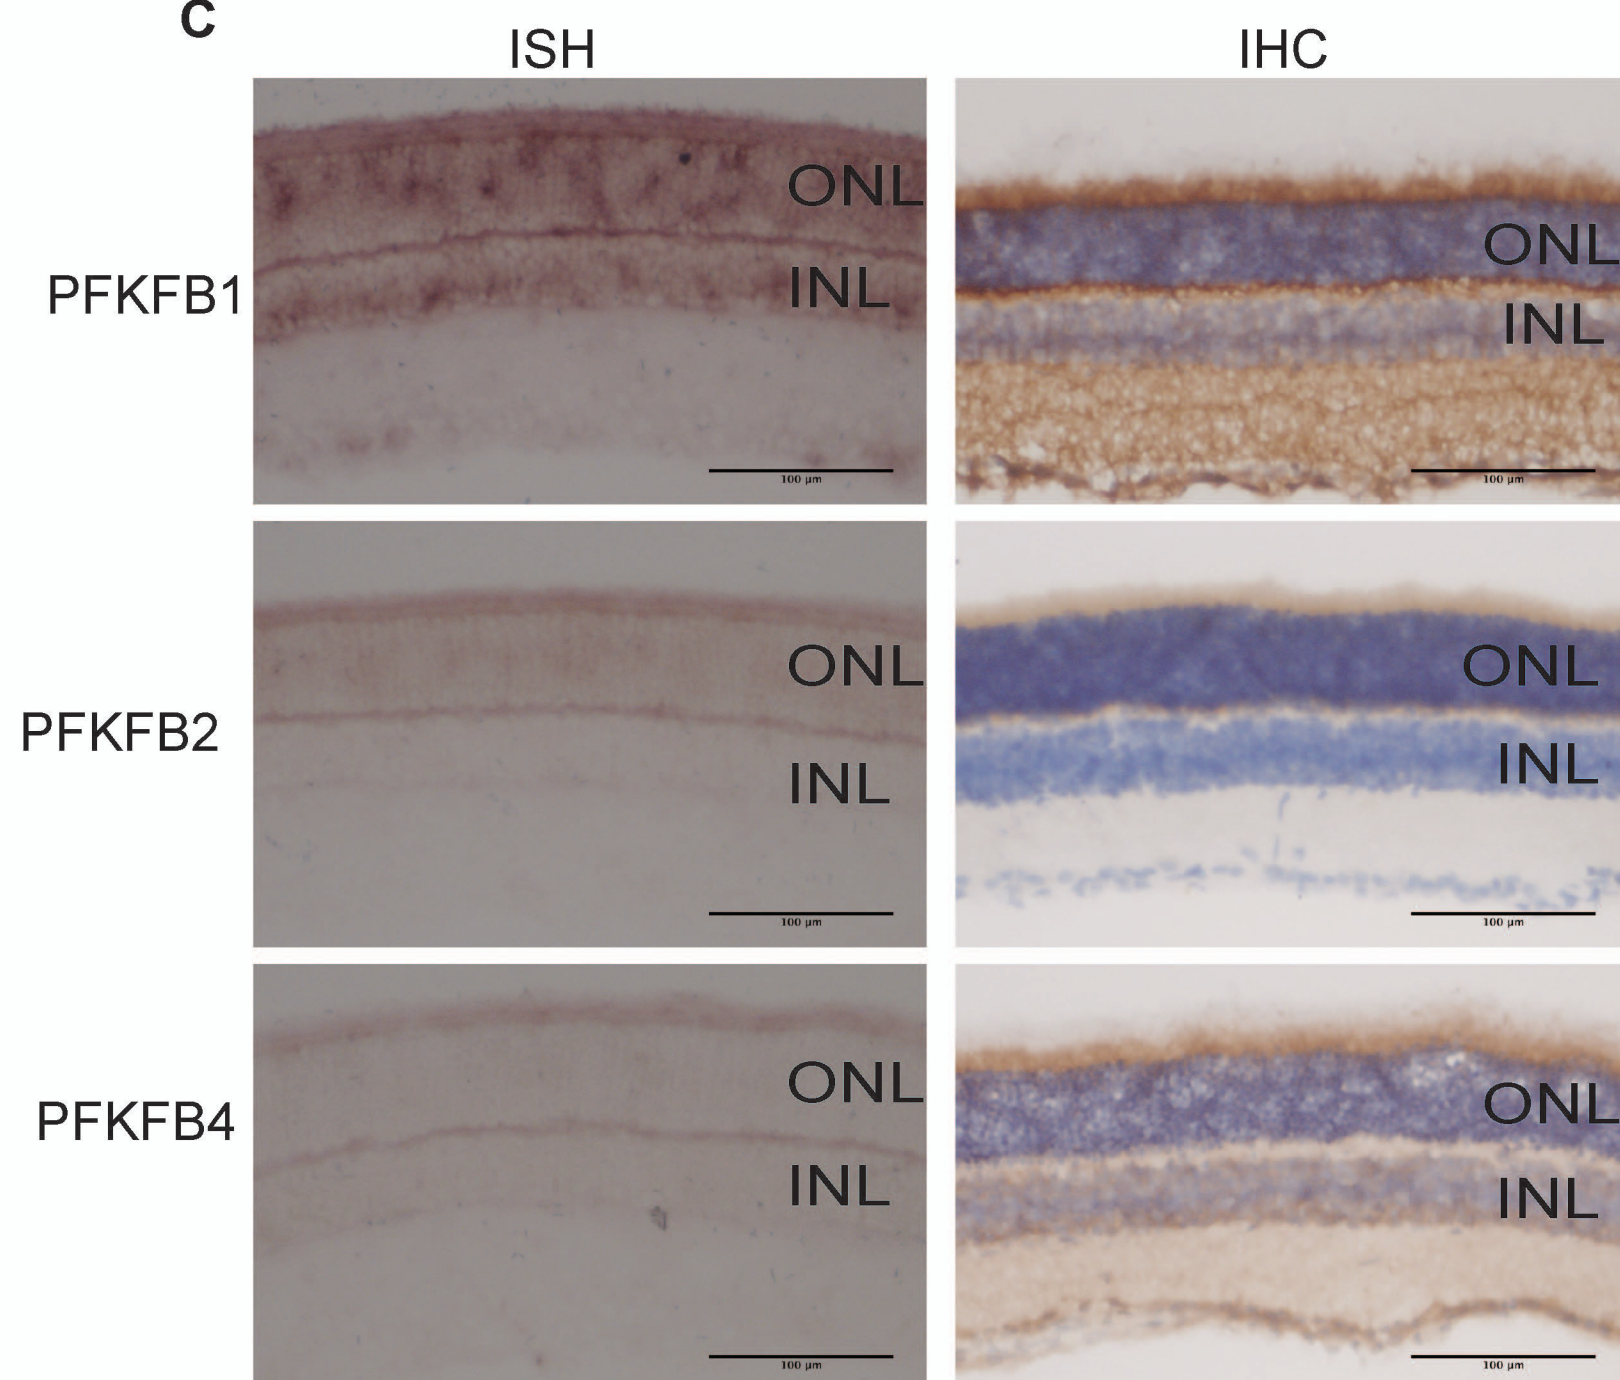**D**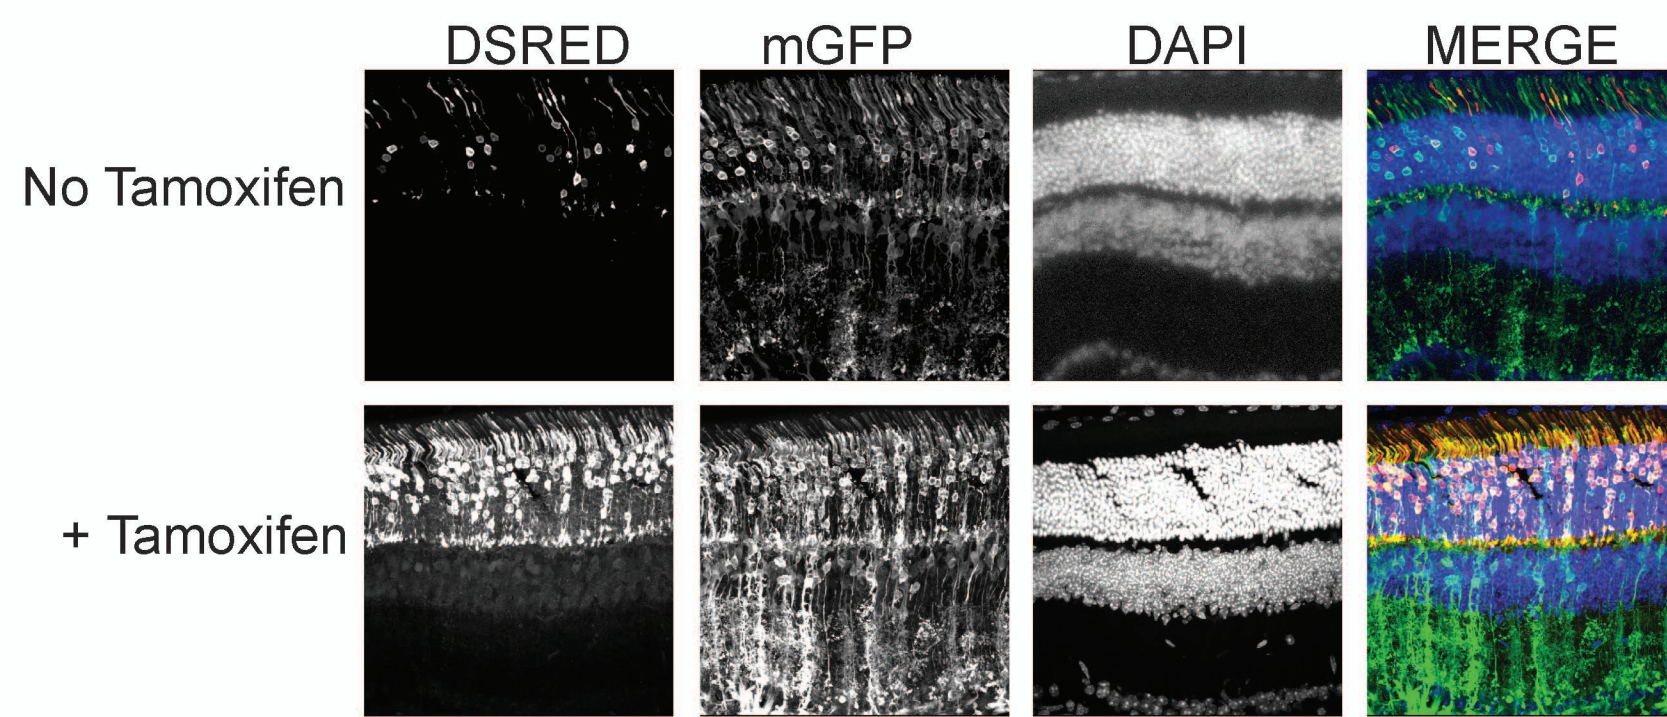**E**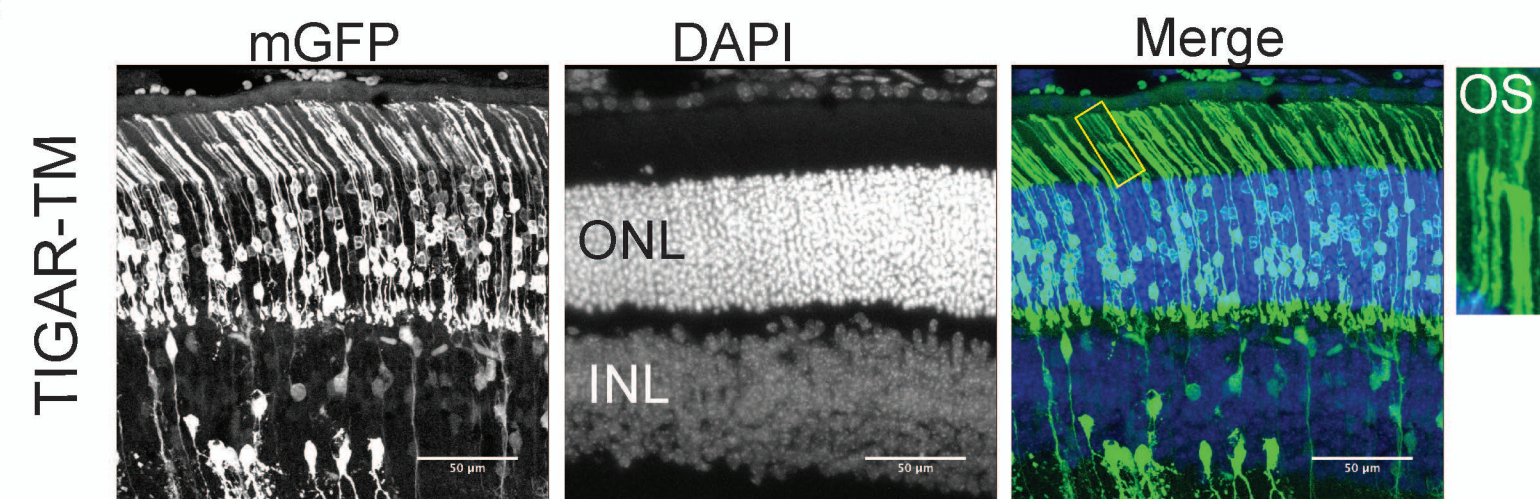**F**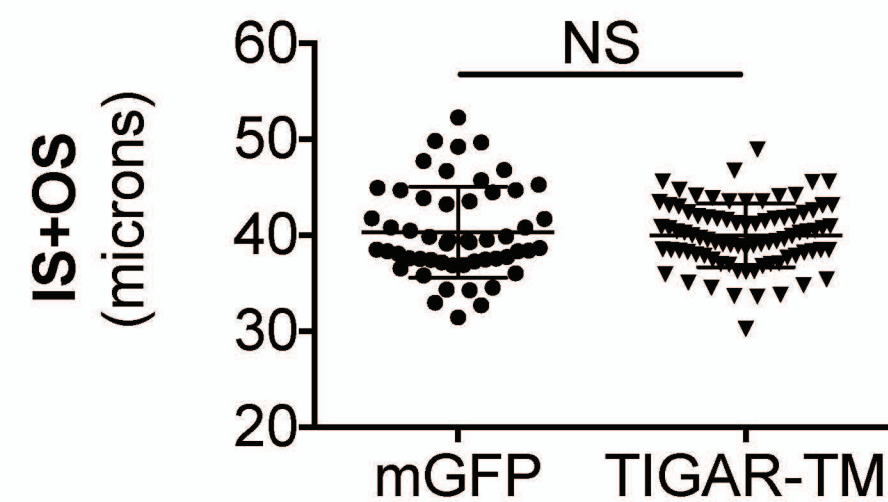**G**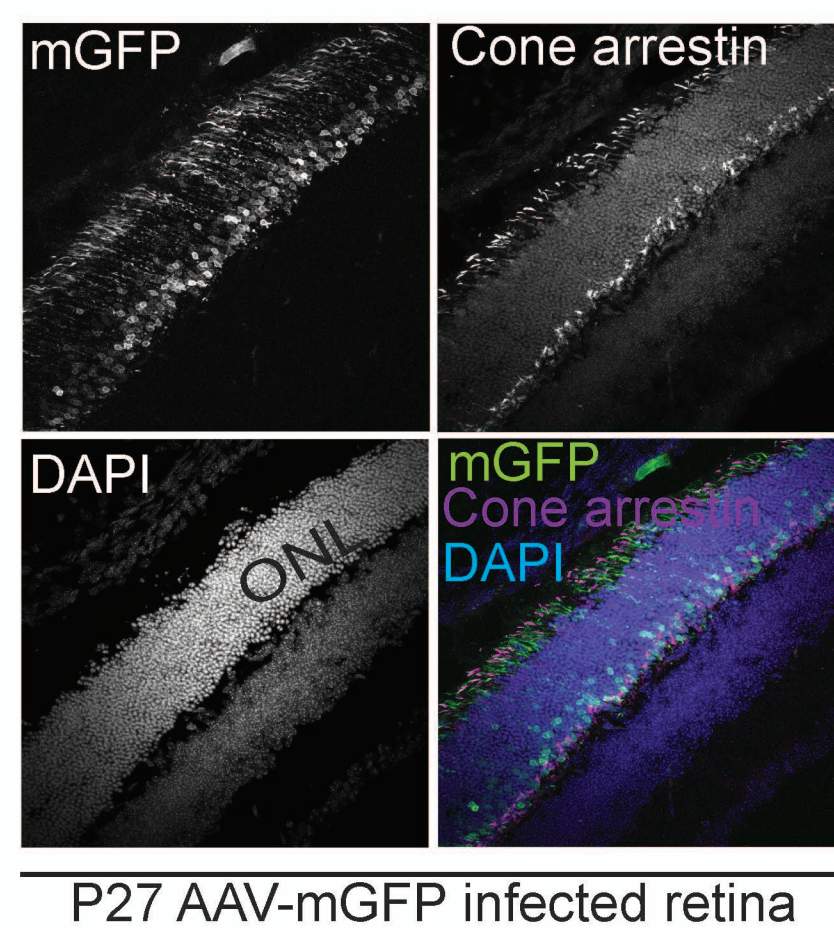**H**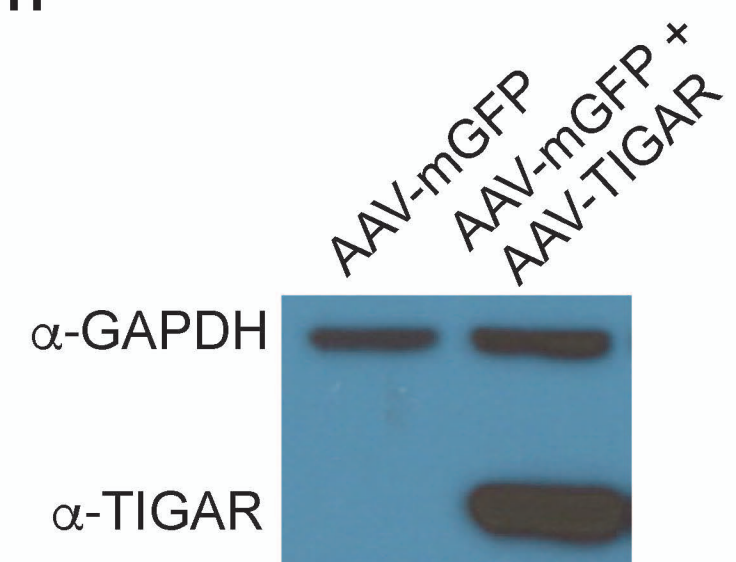

Supplement: supp [file elife_poa_e25946_Figure_2_figure_supplement_1.pdf › elife_poa_e25946_Figure_2_figure_supplement_1.pdf]

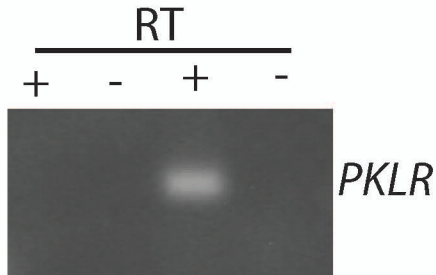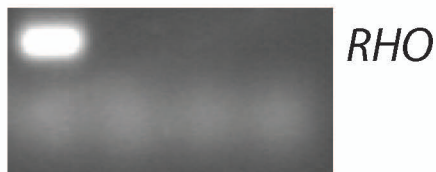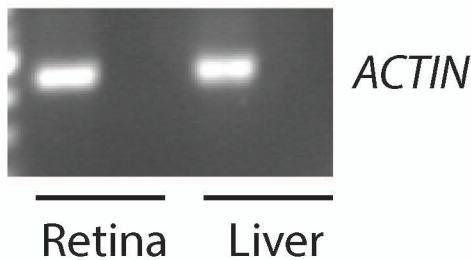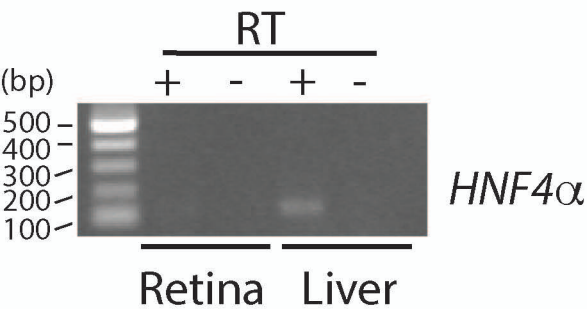

Supplement: supp [file elife_poa_e25946_Figure_3_figure_supplement_1.pdf › elife_poa_e25946_Figure_3_figure_supplement_1.pdf]

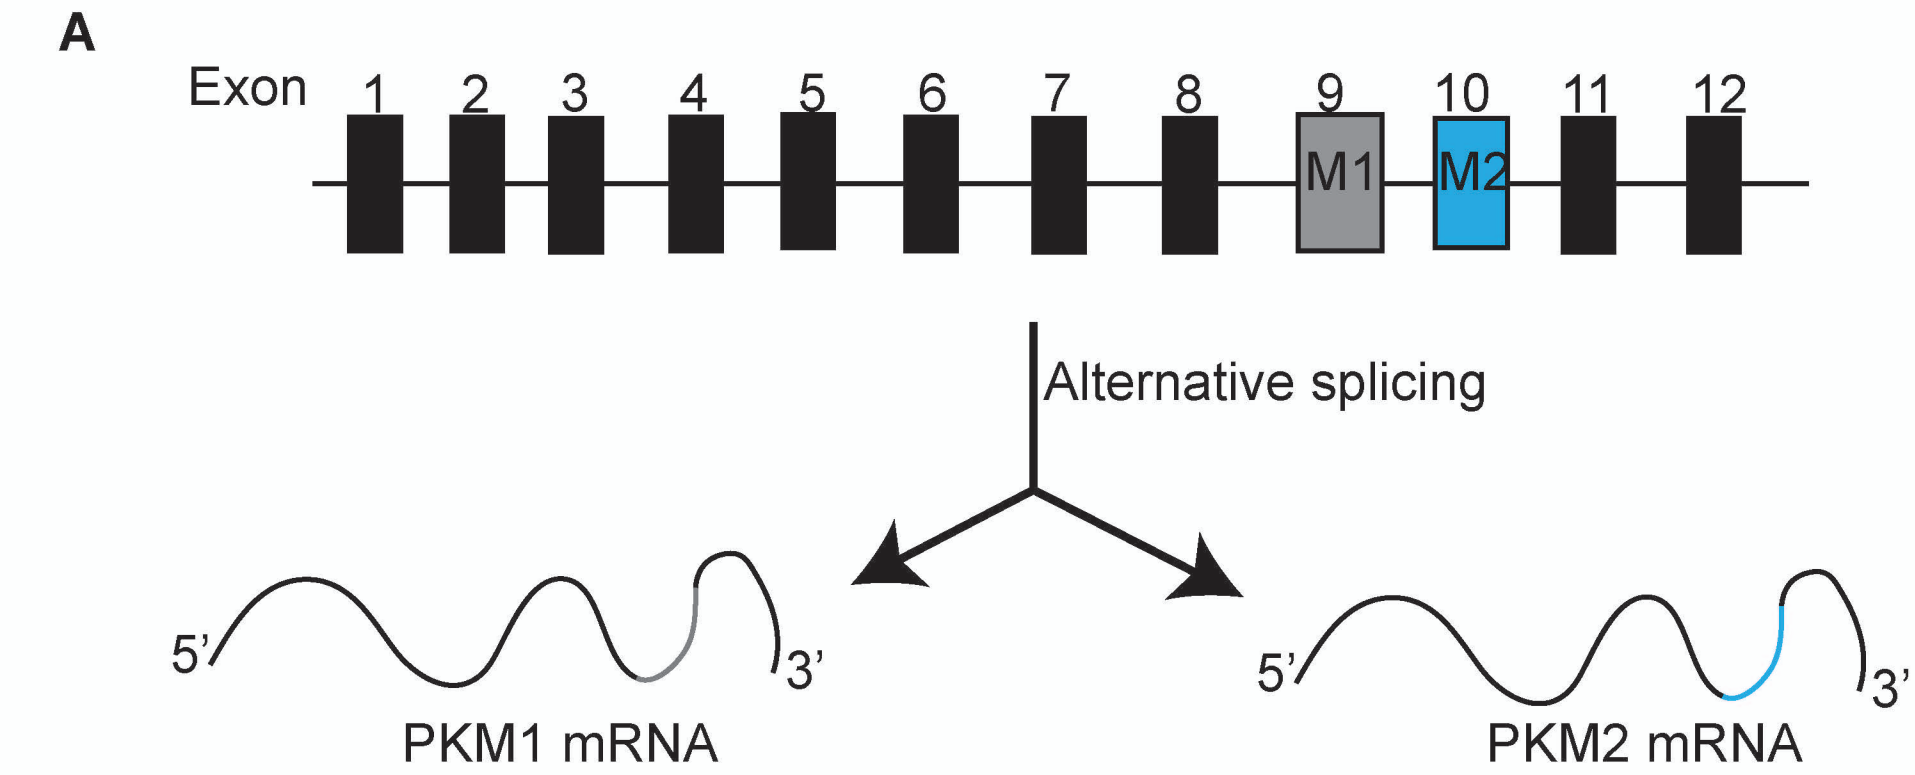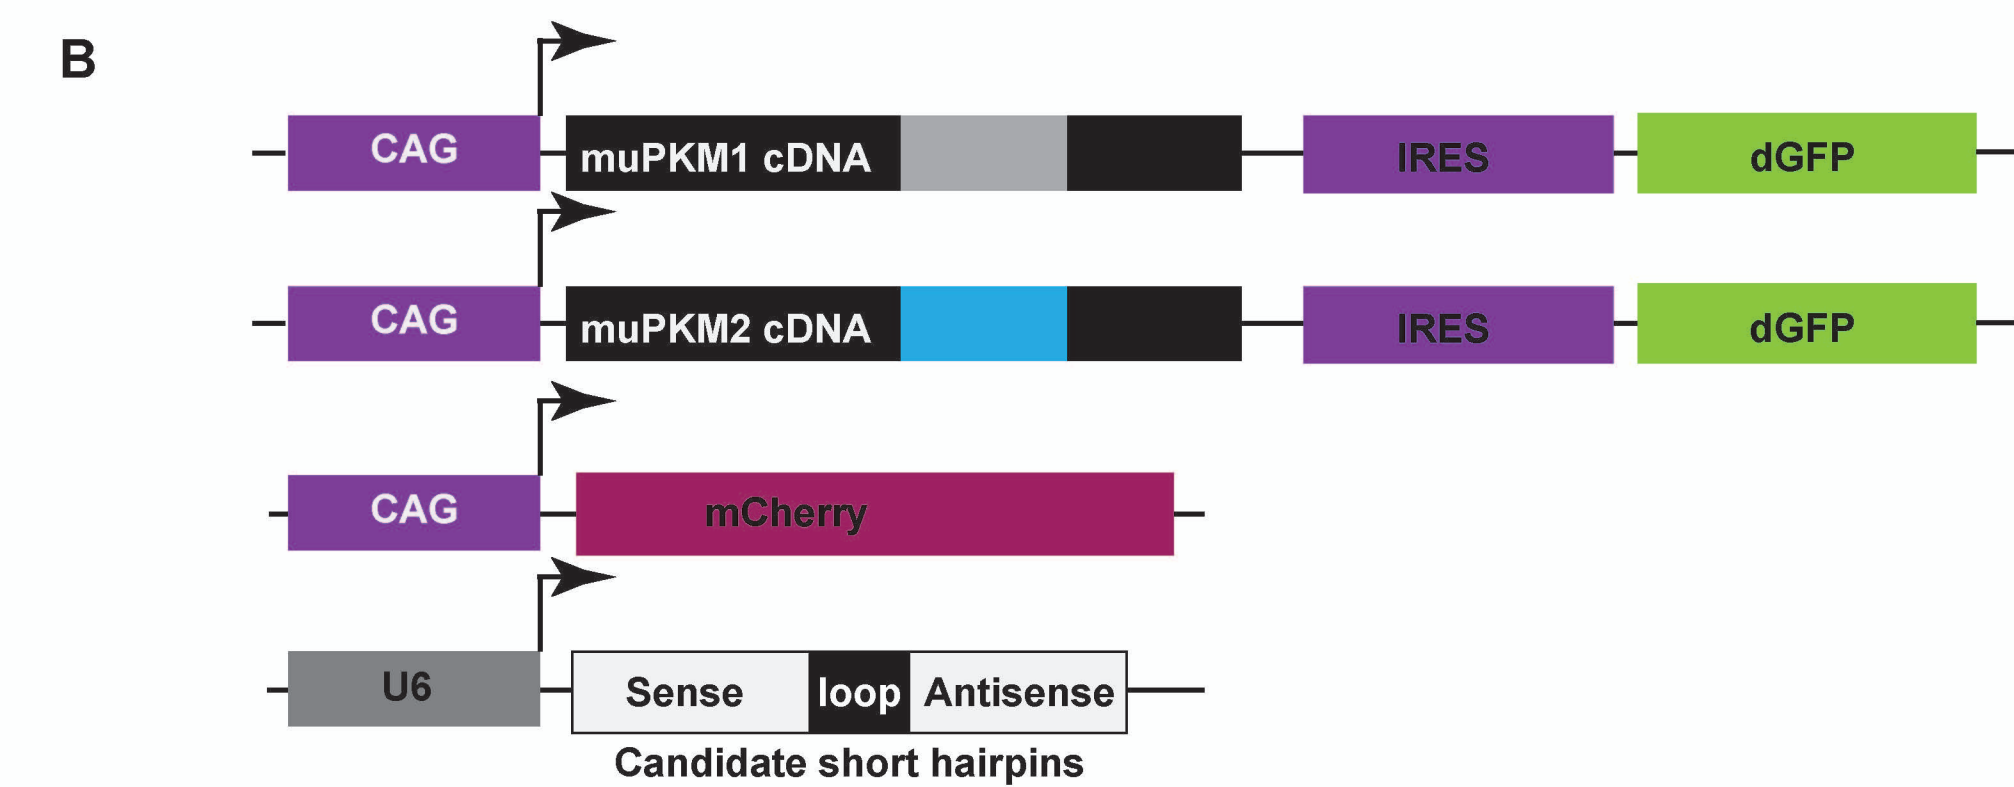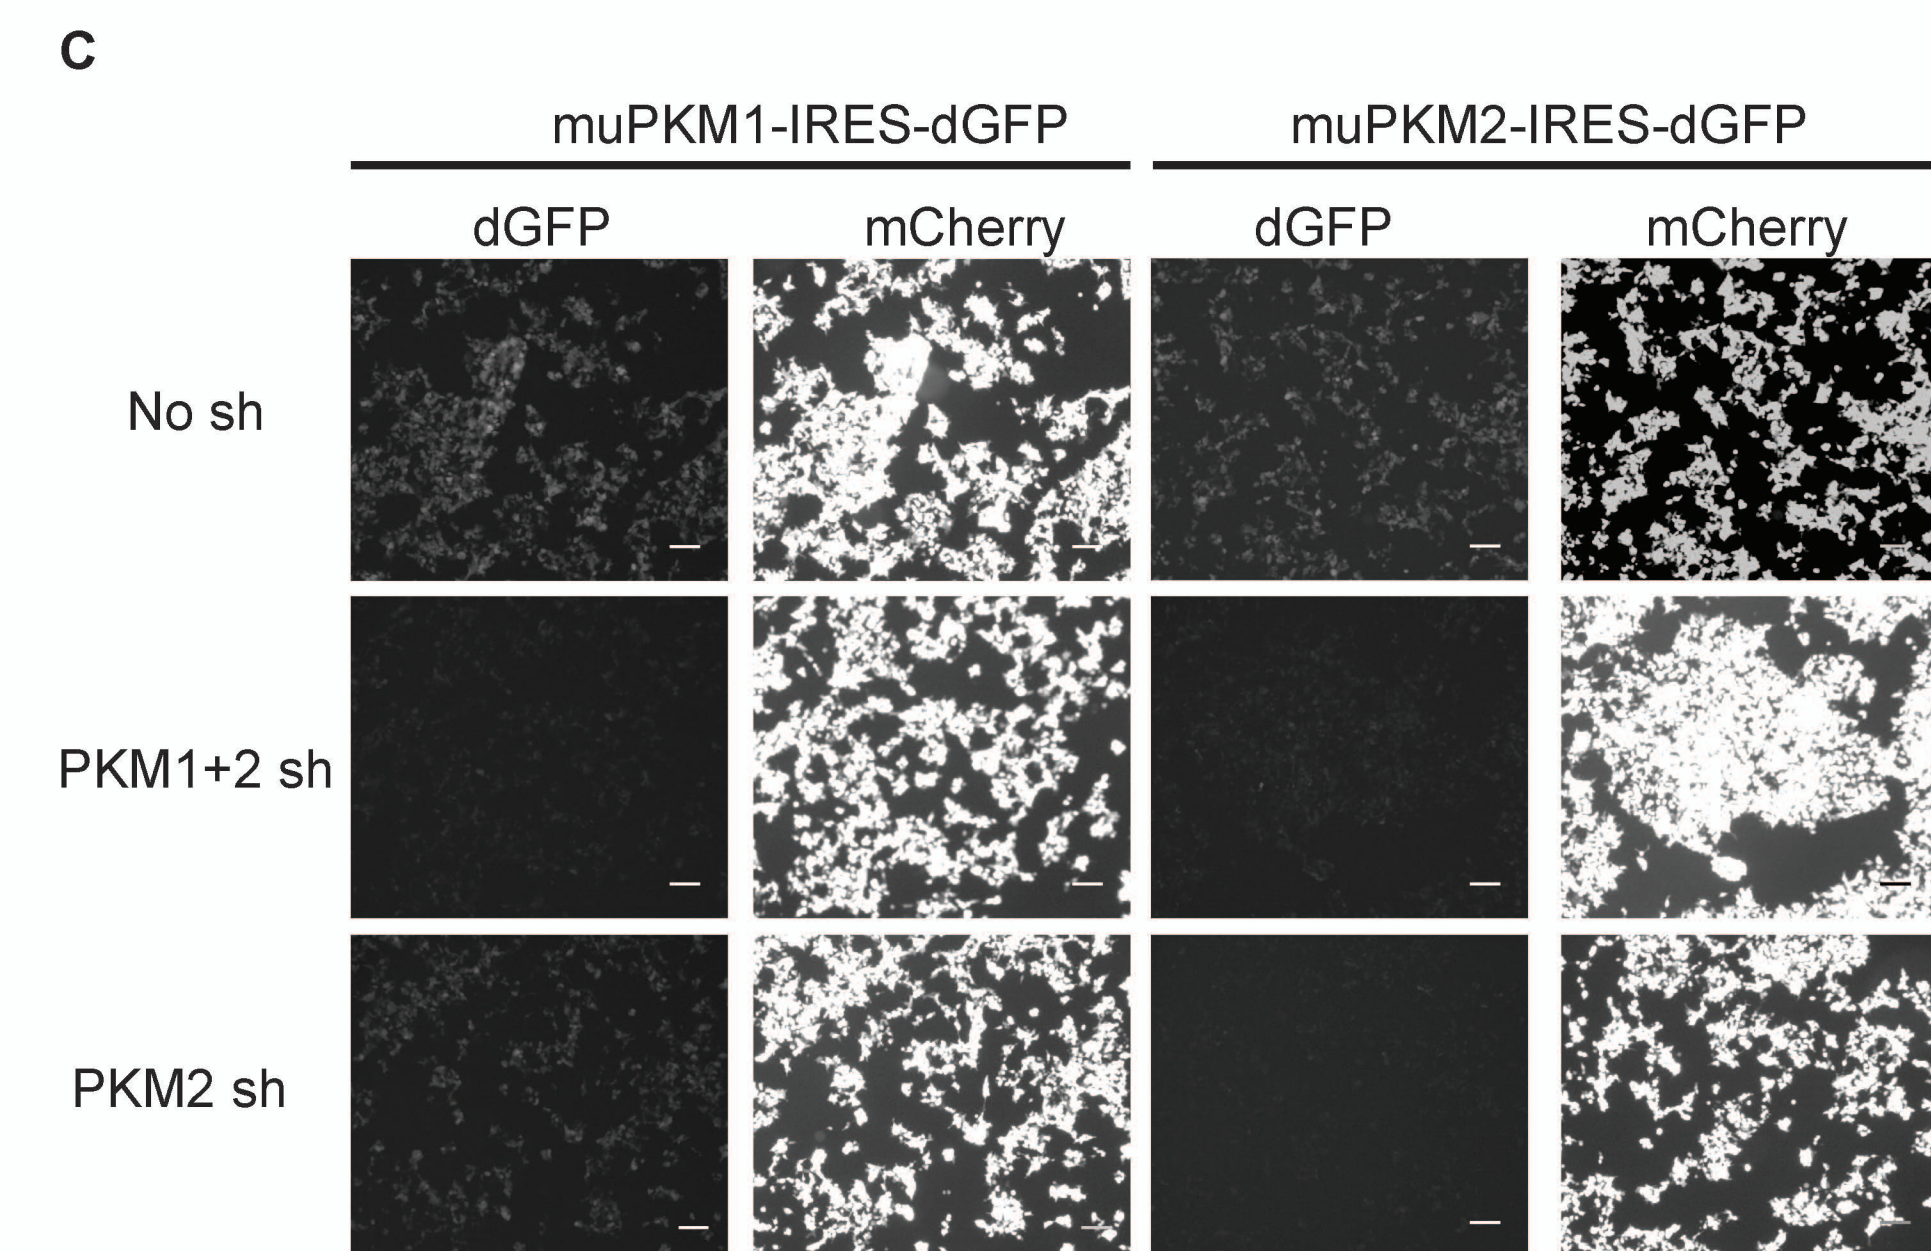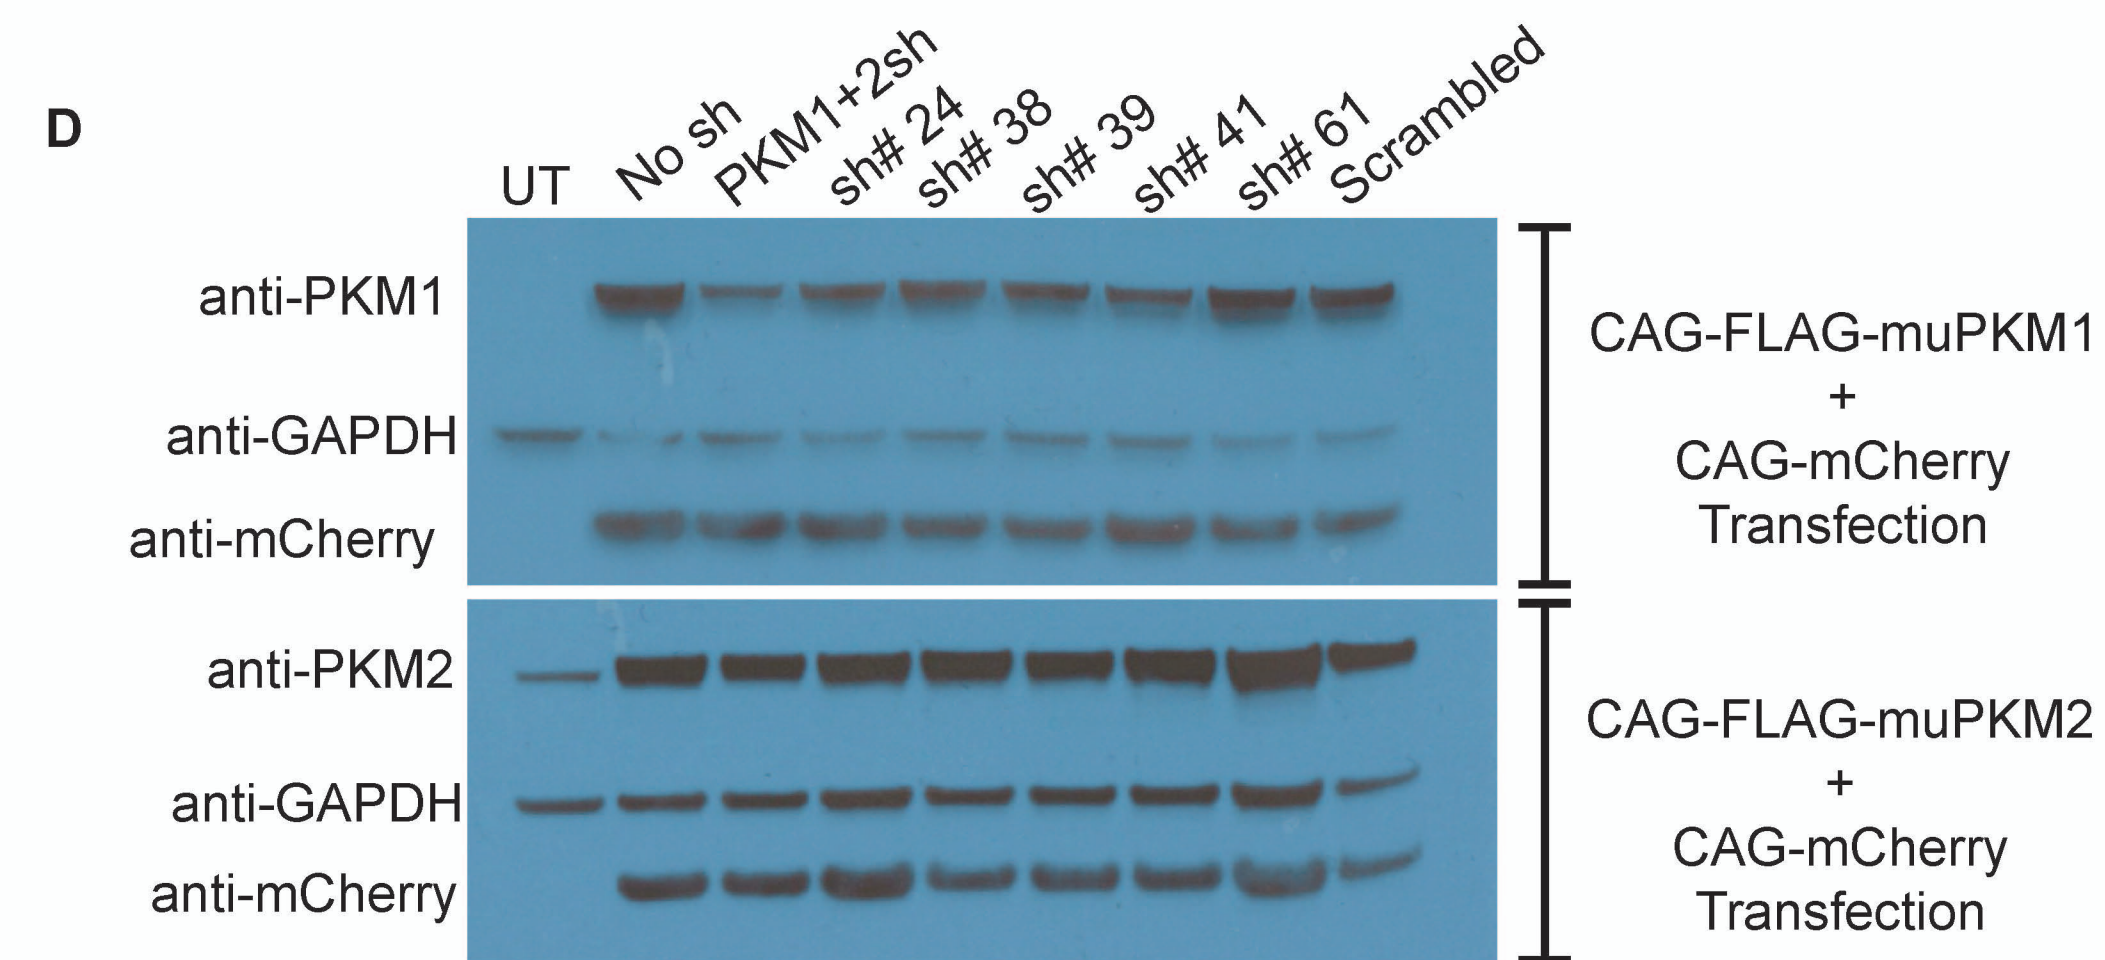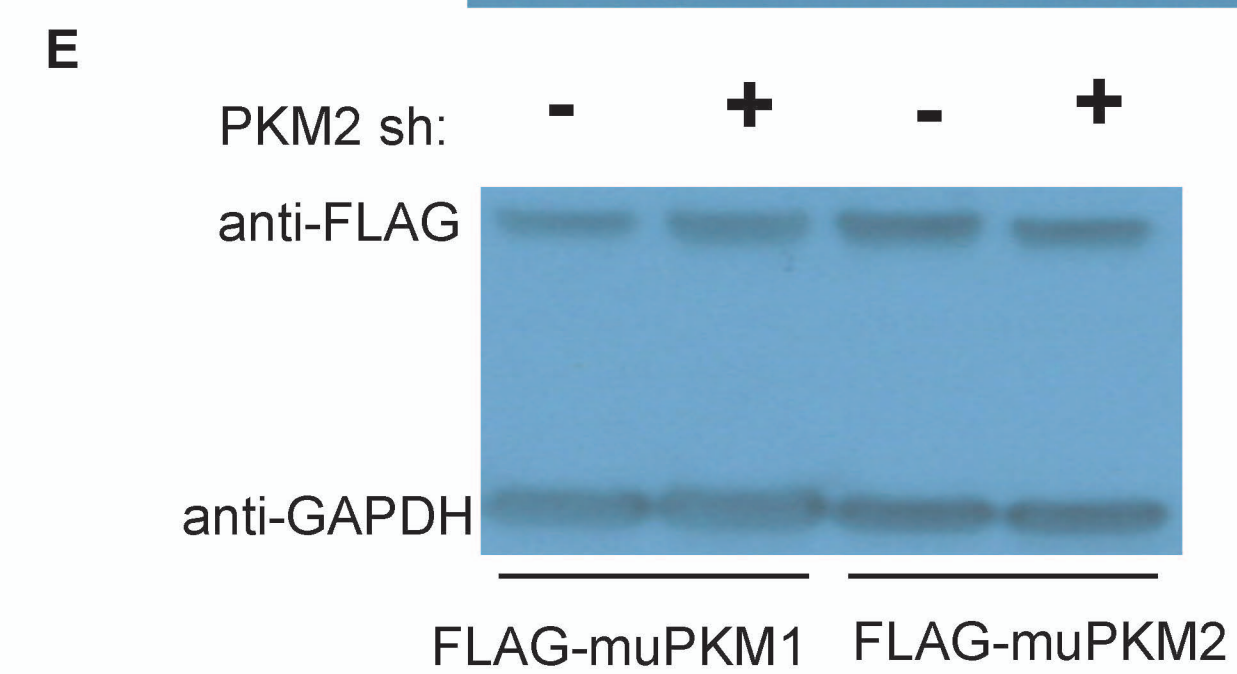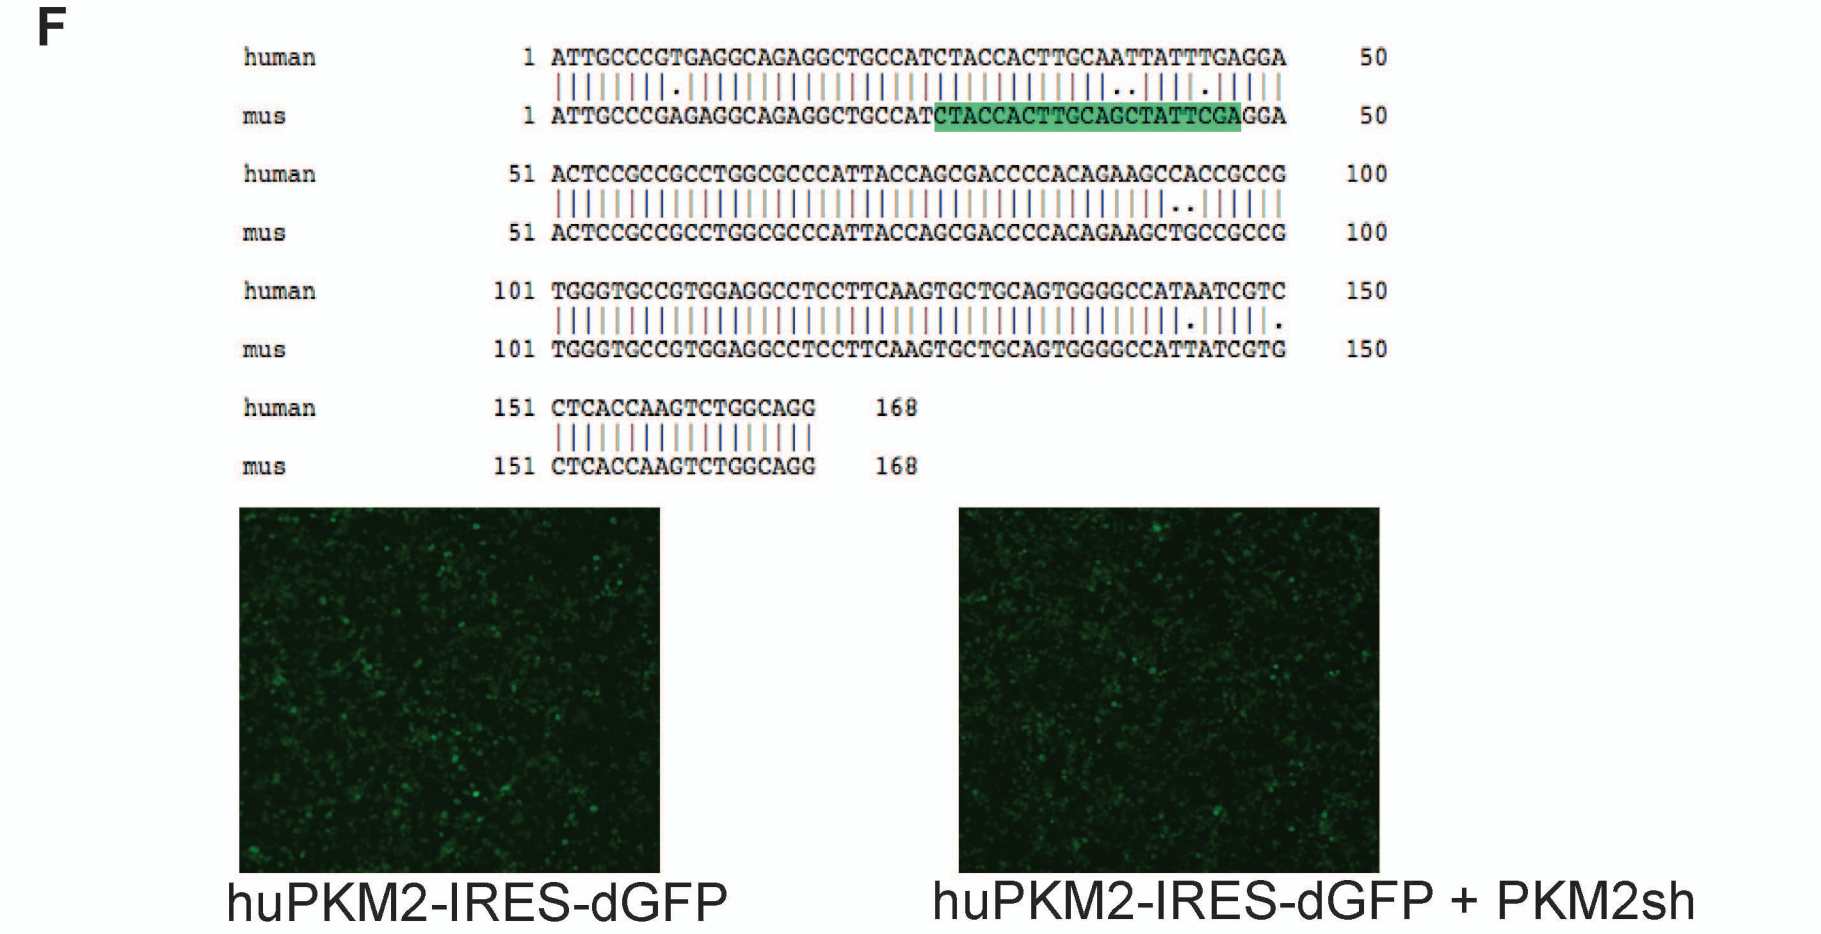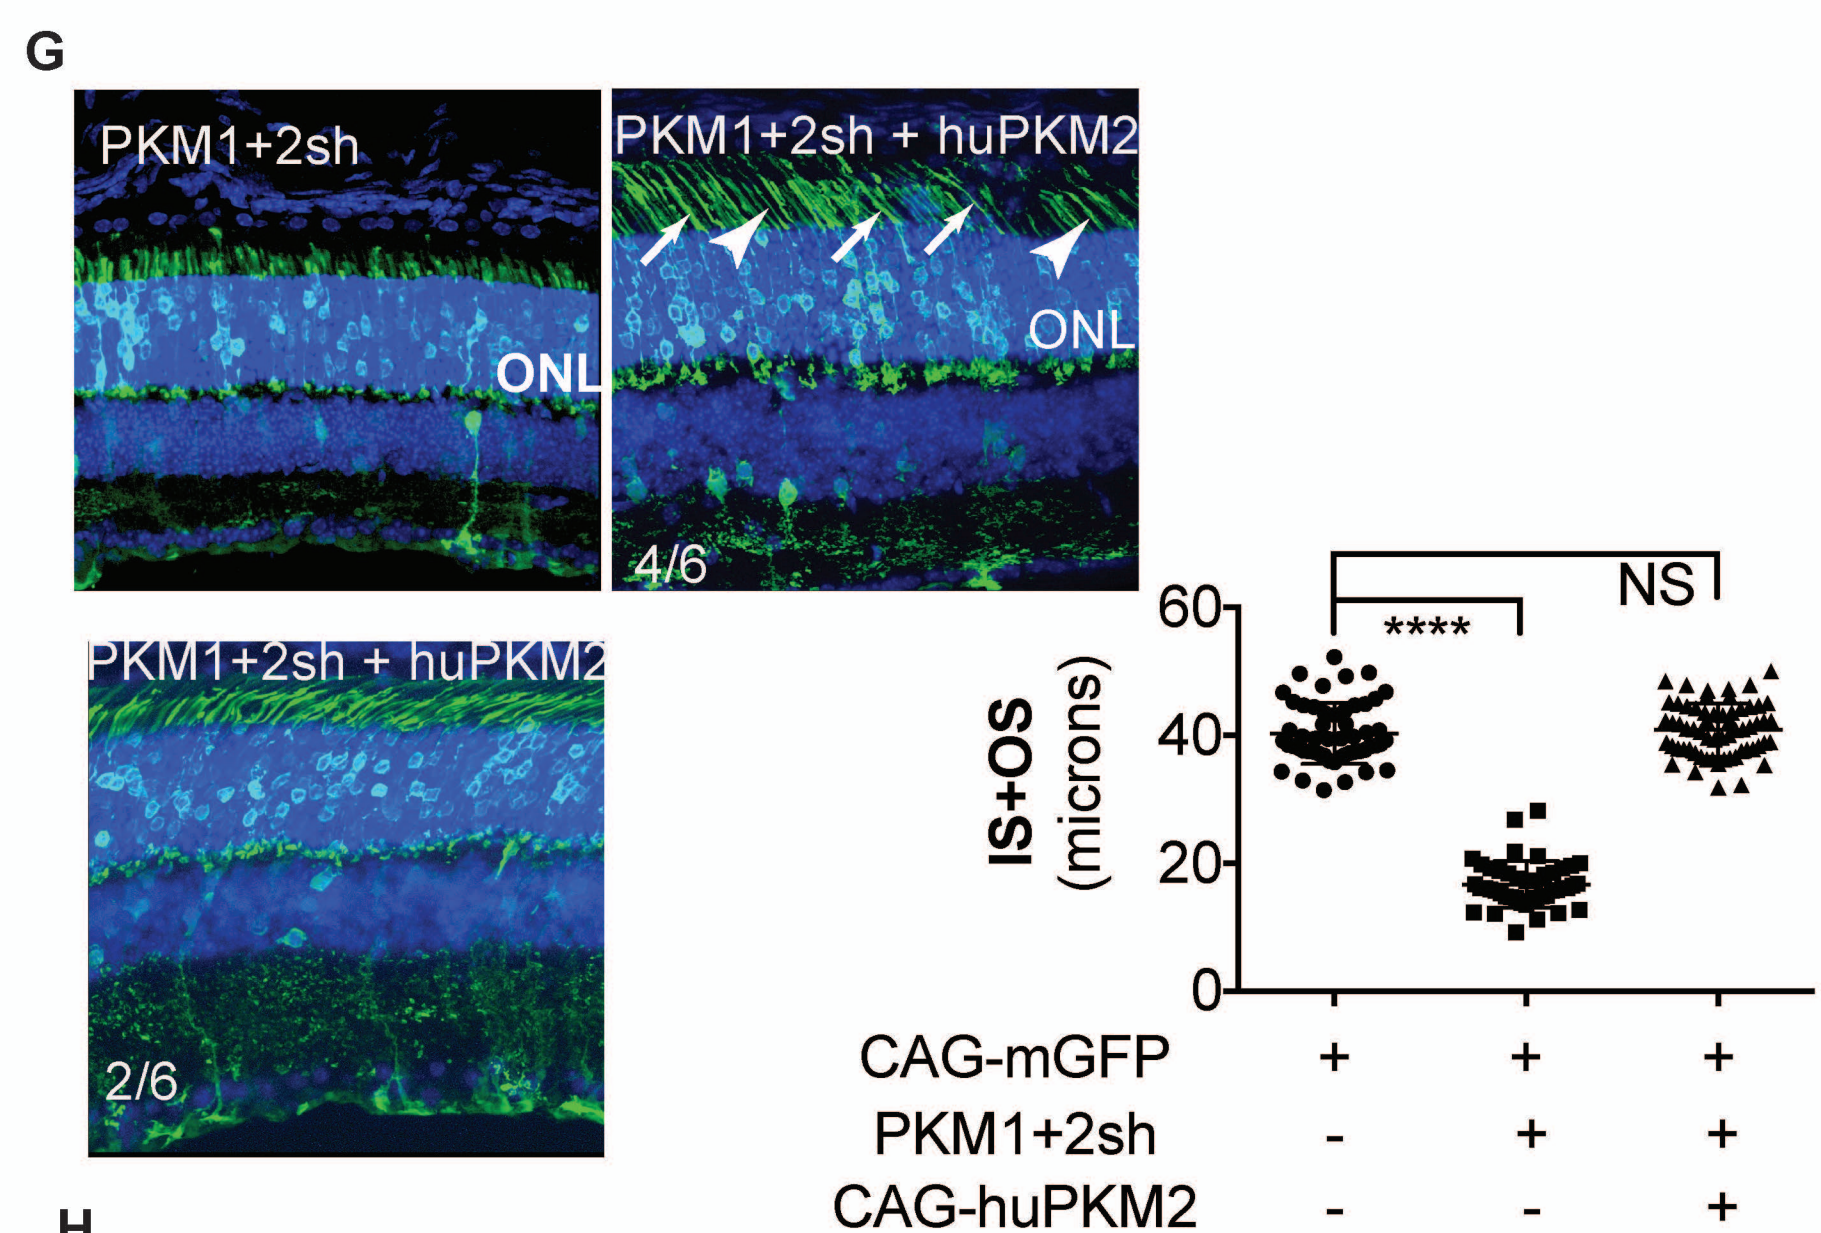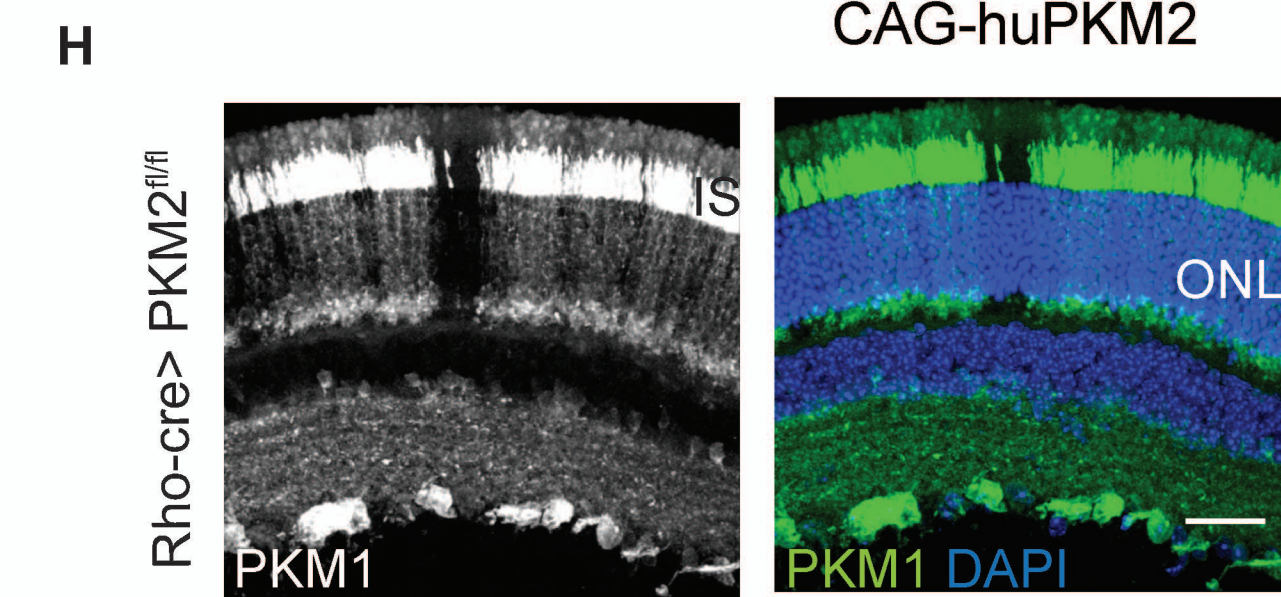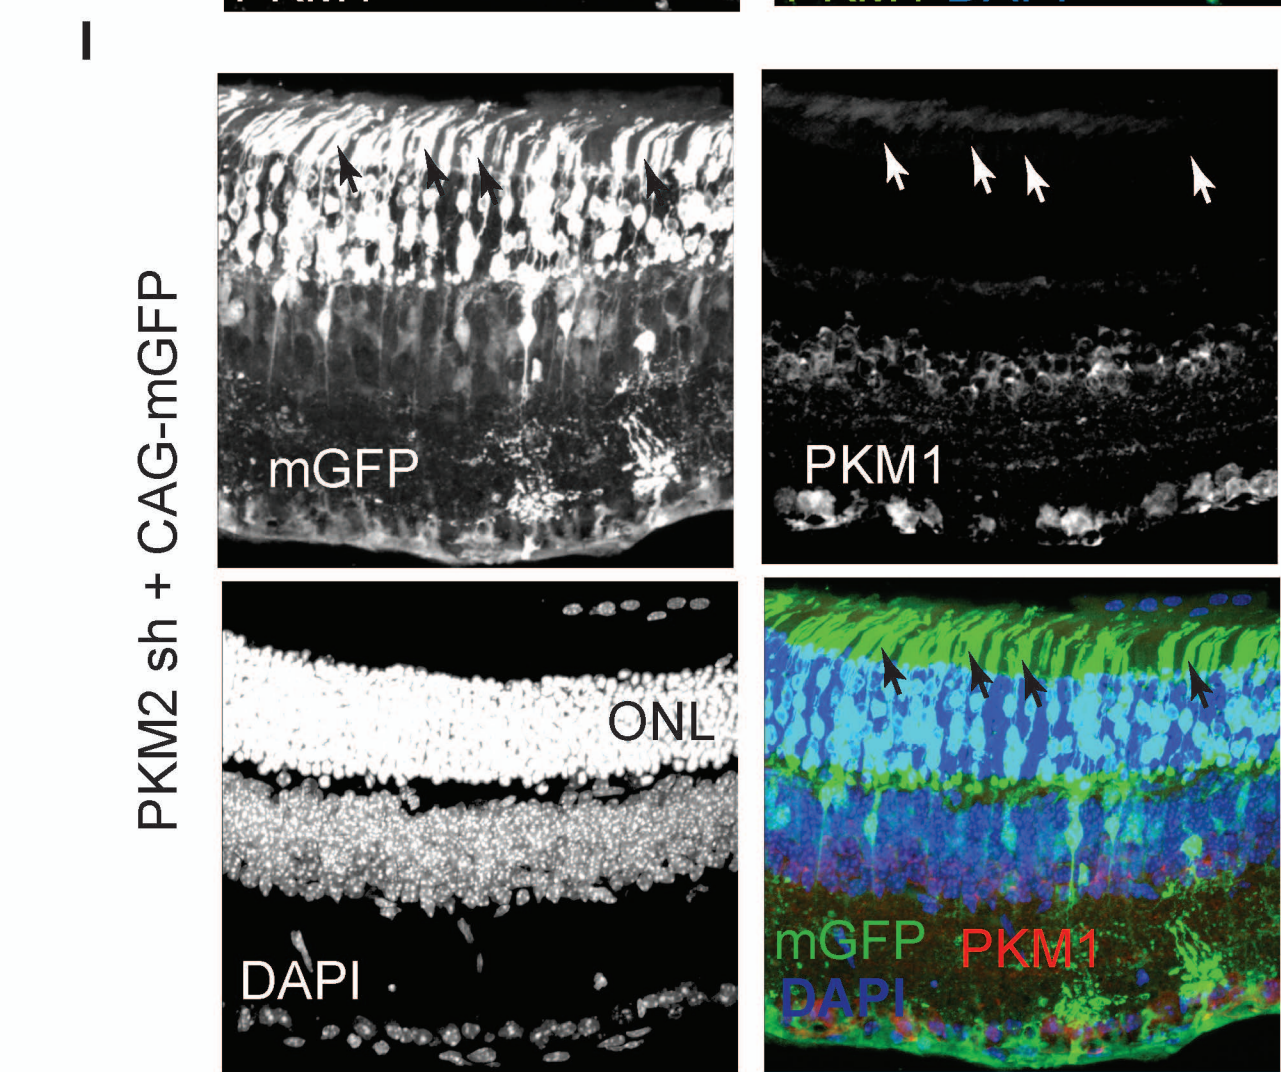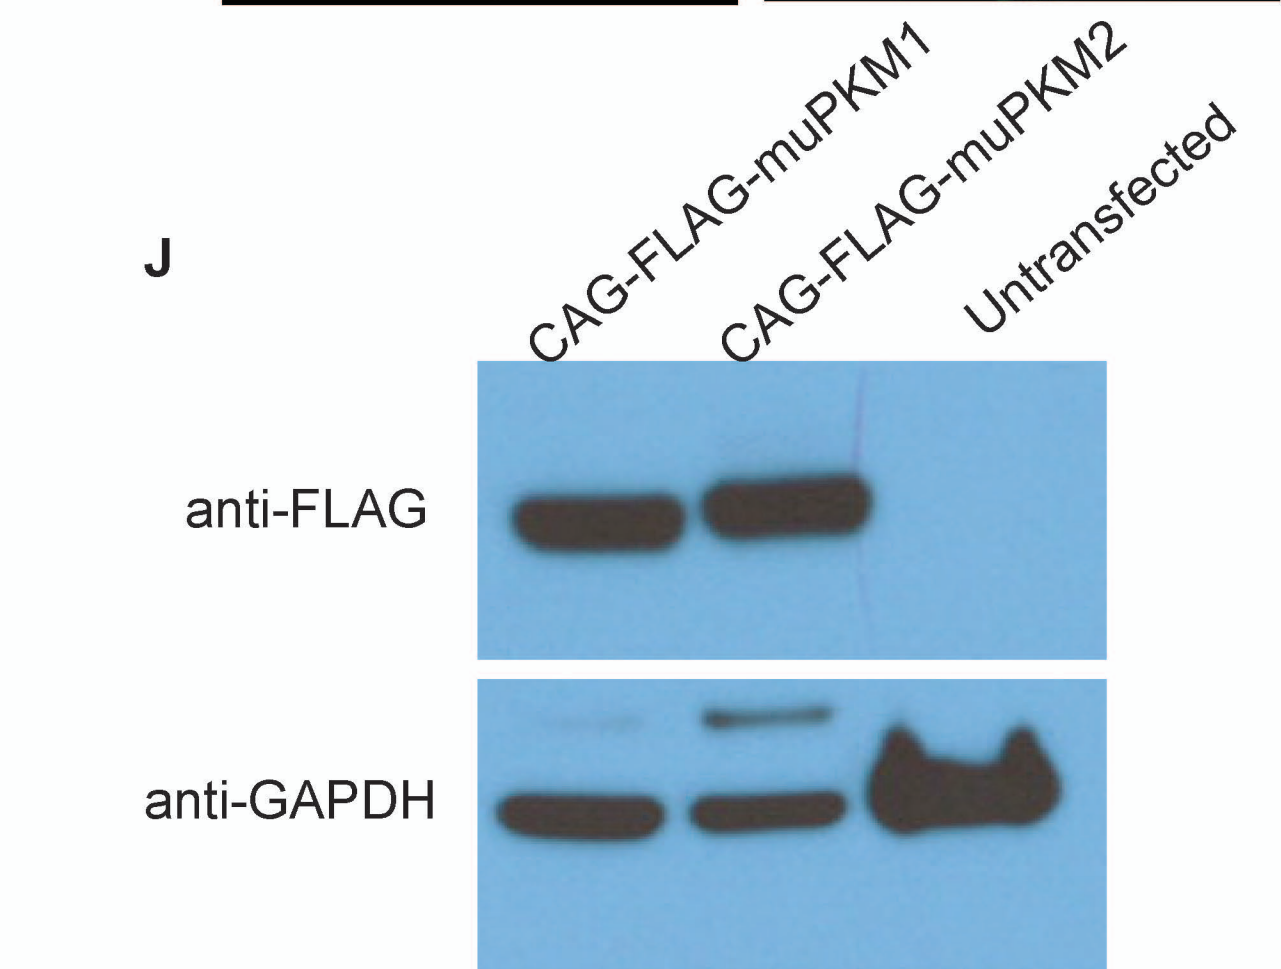

Supplement: supp [file elife_poa_e25946_Figure_3_figure_supplement_2.pdf › elife_poa_e25946_Figure_3_figure_supplement_2.pdf]

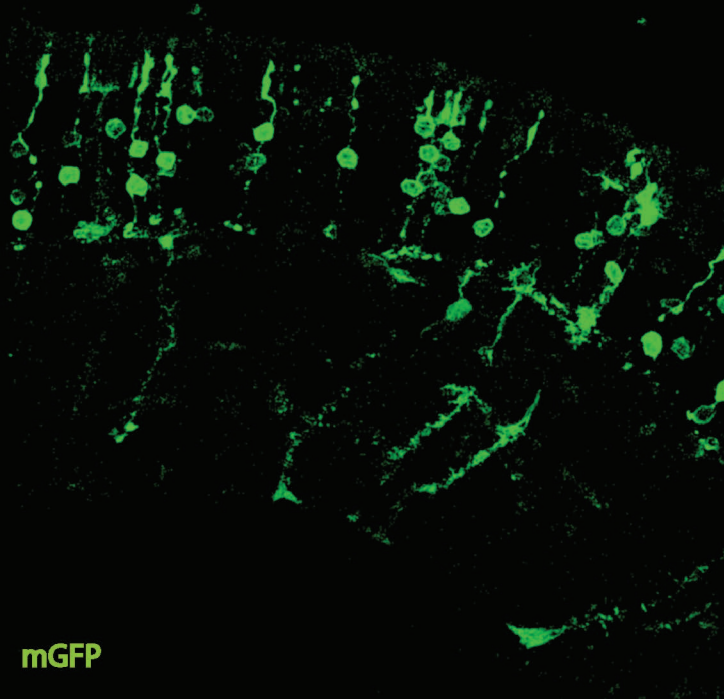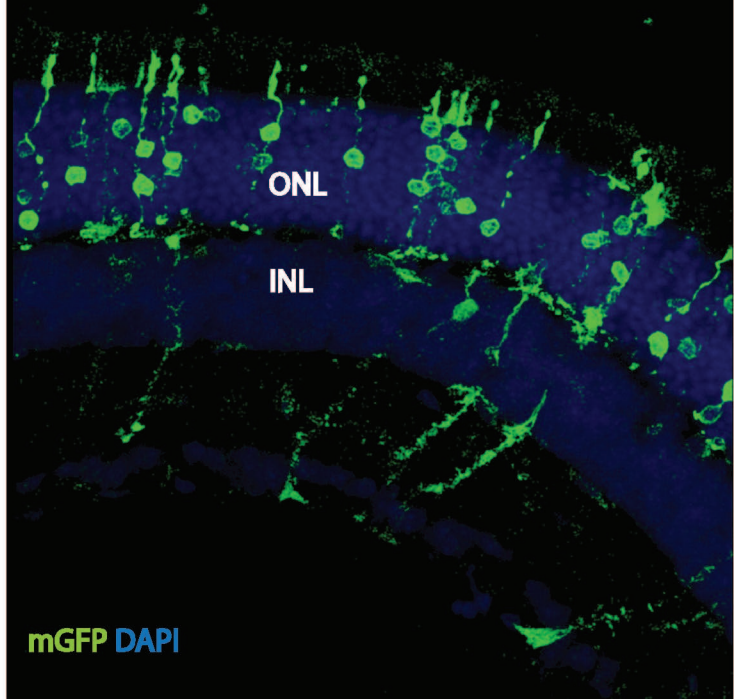

Supplement: supp [file elife_poa_e25946_Figure_3_figure_supplement_3.pdf › elife_poa_e25946_Figure_3_figure_supplement_3.pdf]

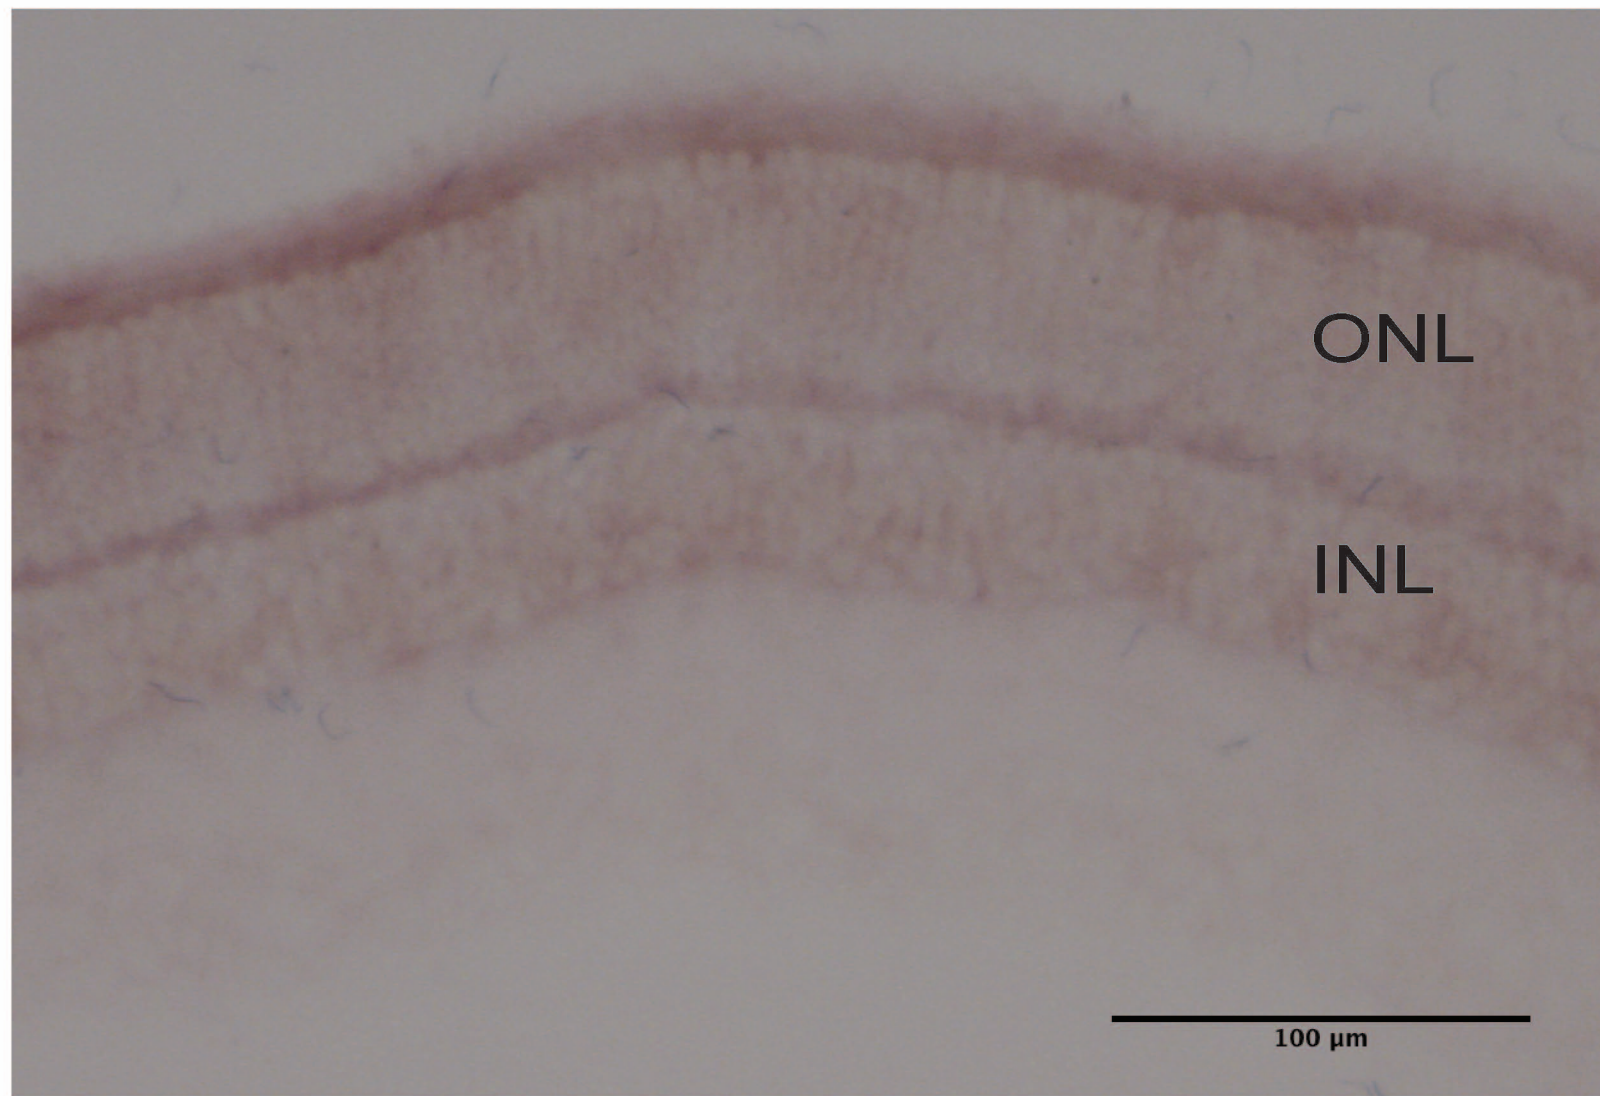

***SRSF3***

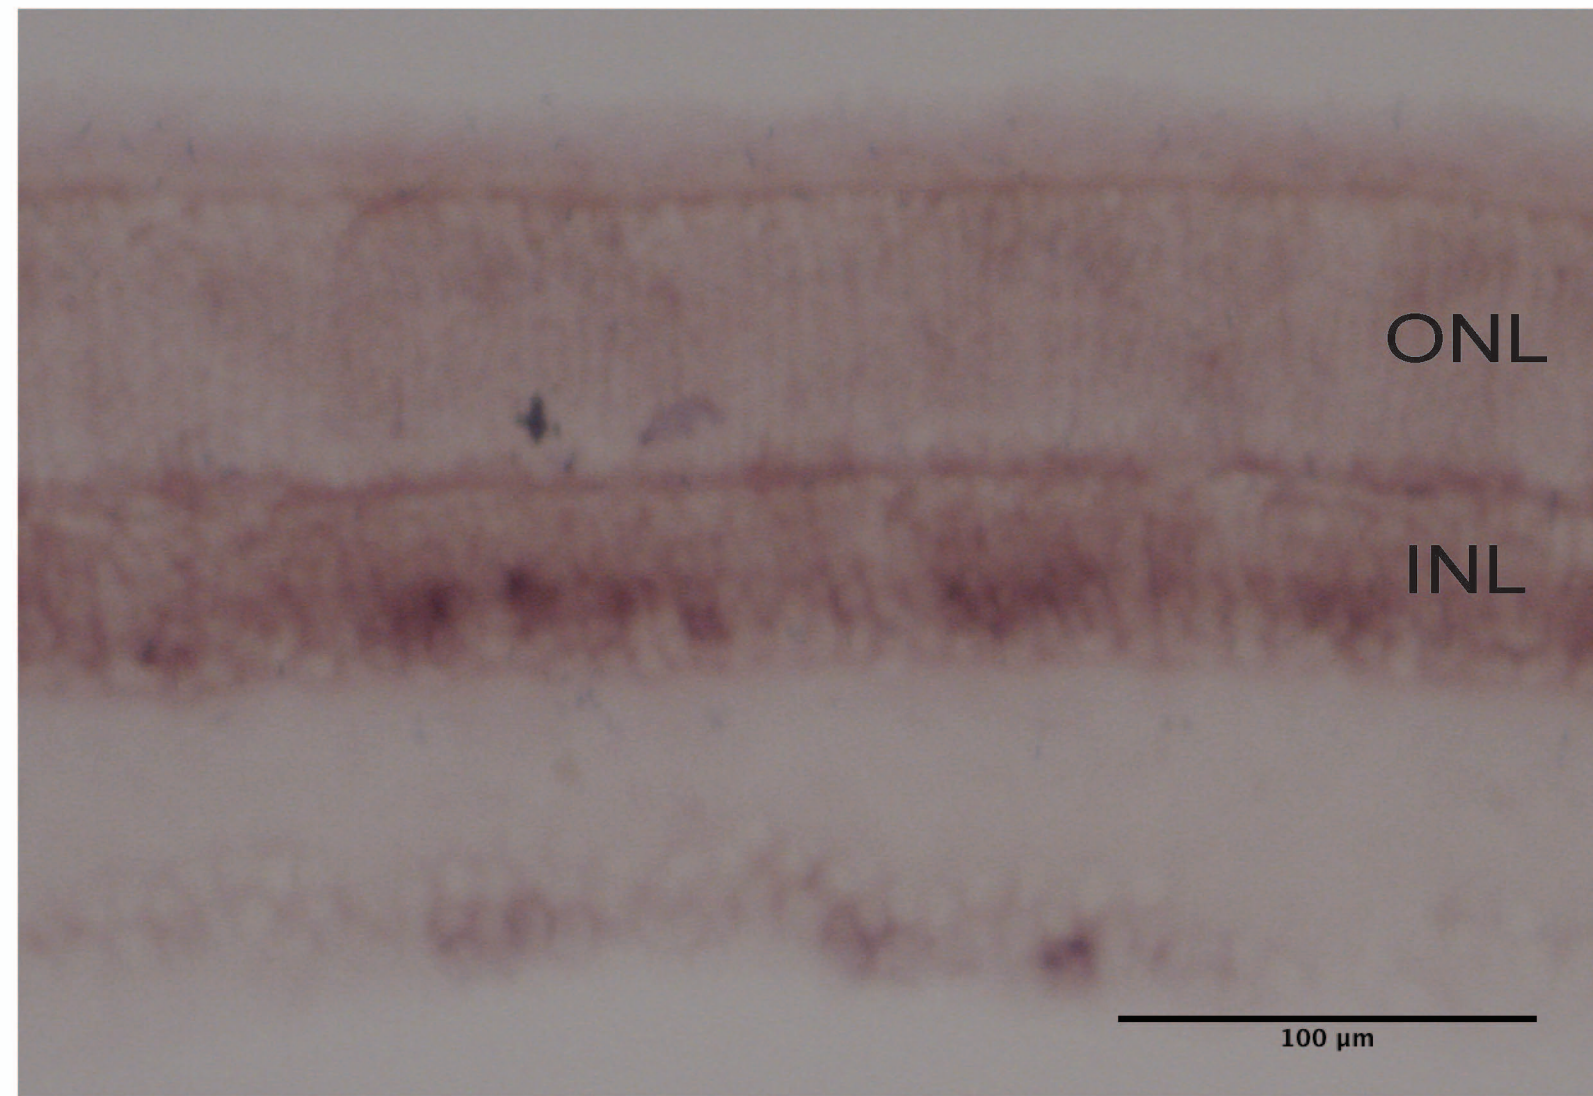

***PTBP1***

Supplement: supp [file elife_poa_e25946_Figure_3_figure_supplement_4.pdf › elife_poa_e25946_Figure_3_figure_supplement_4.pdf]

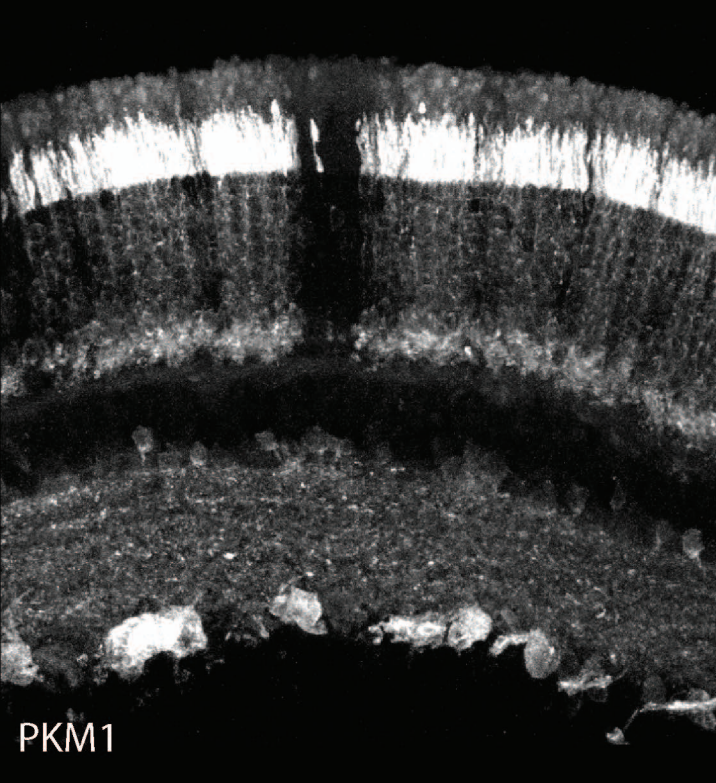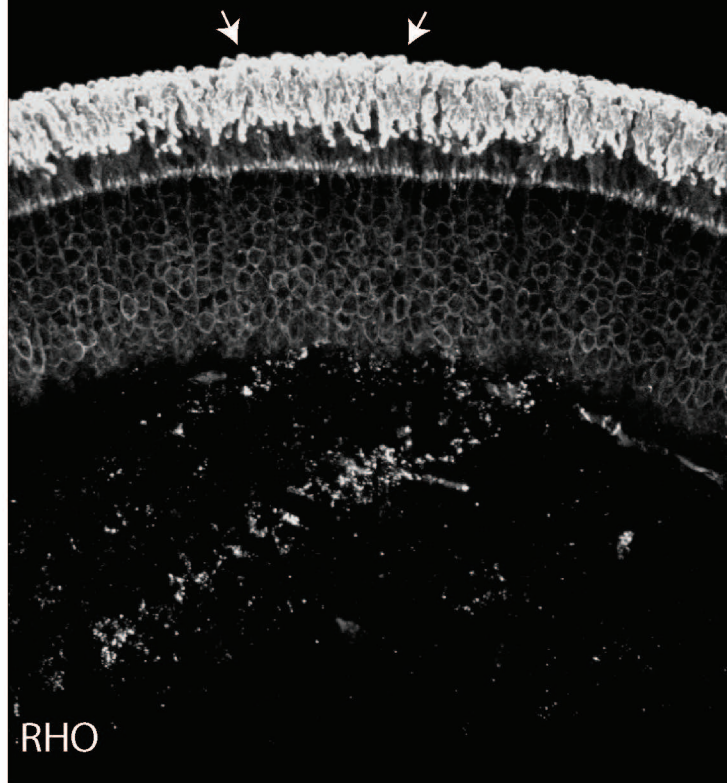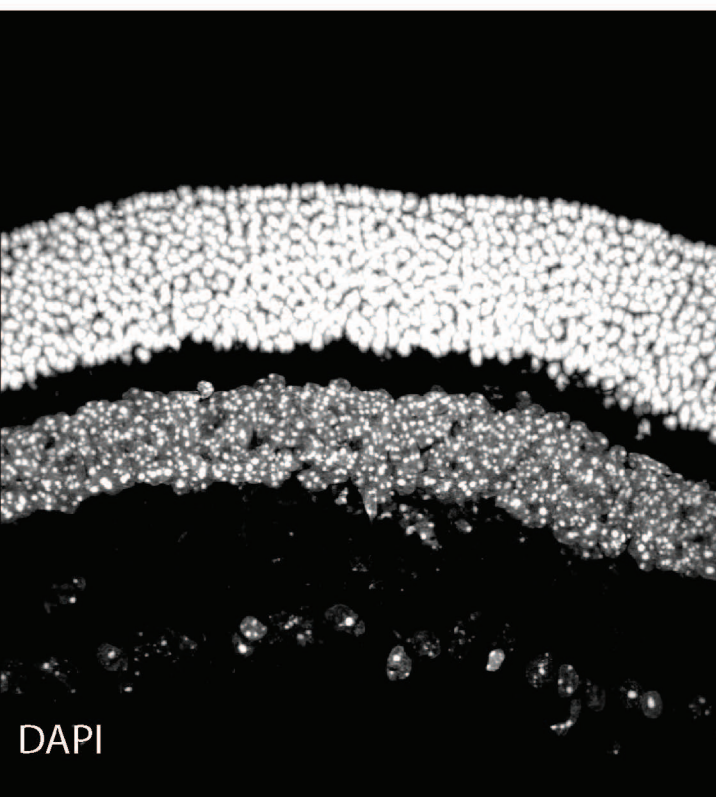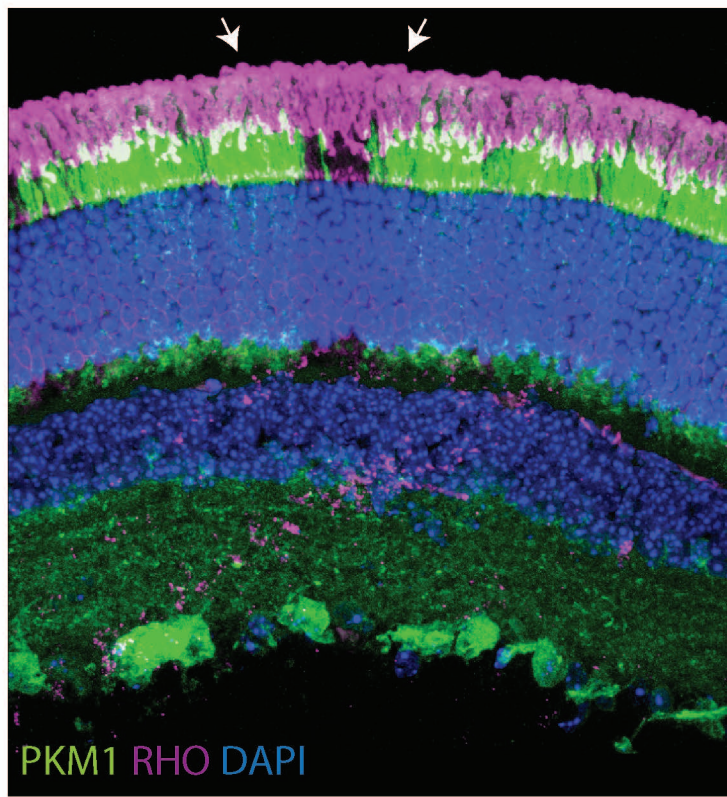

Supplement: supp [file elife_poa_e25946_Figure_3_figure_supplement_5.pdf › elife_poa_e25946_Figure_3_figure_supplement_5.pdf]

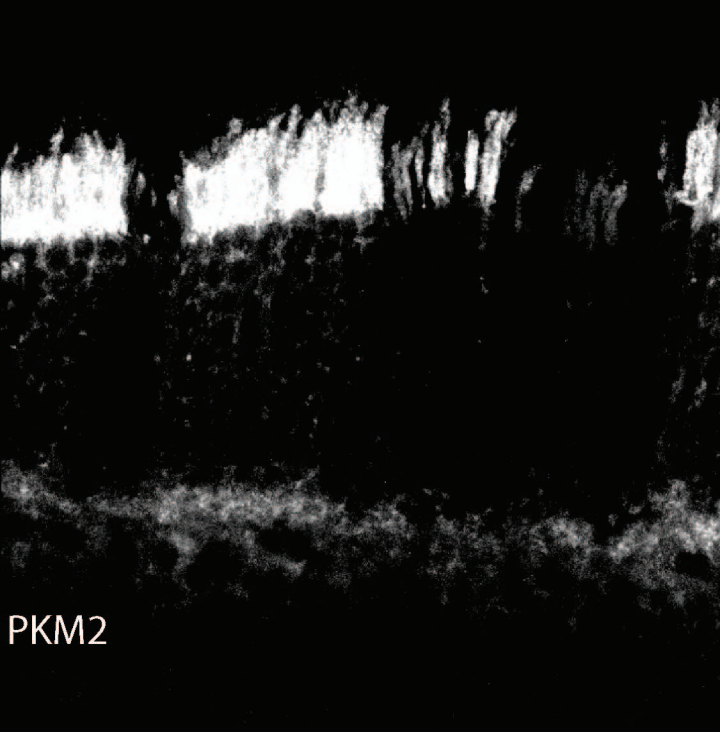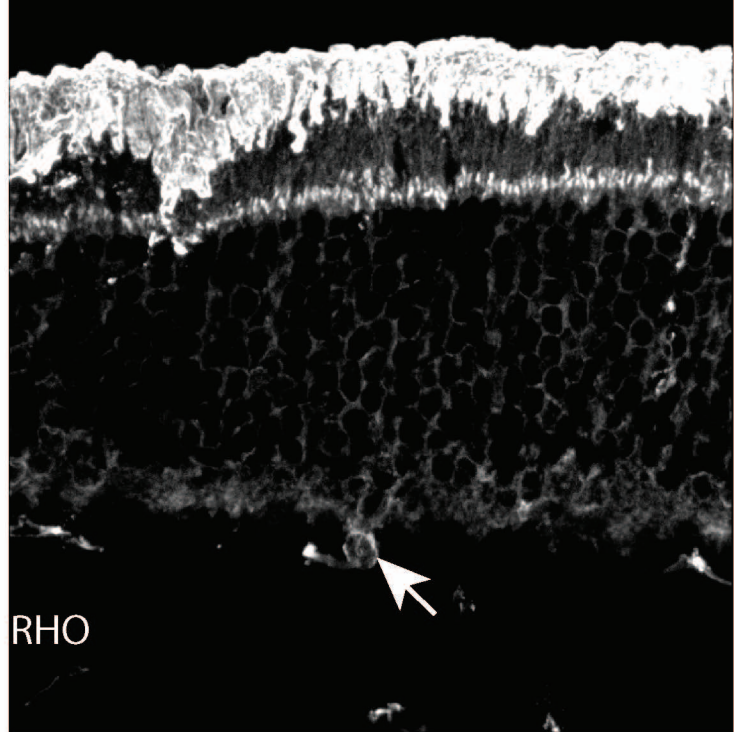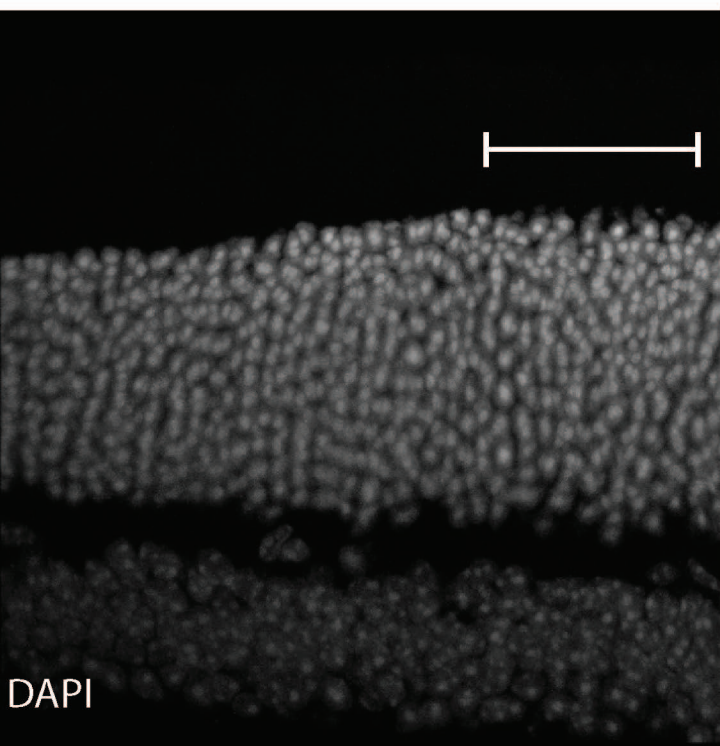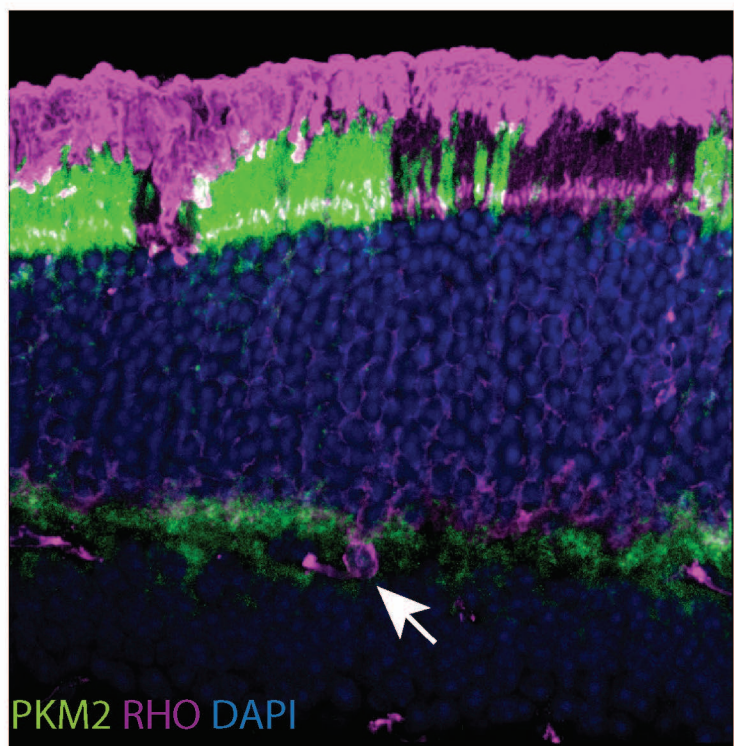

Supplement: supp [file elife_poa_e25946_Figure_3_figure_supplement_6.pdf › elife_poa_e25946_Figure_3_figure_supplement_6.pdf]

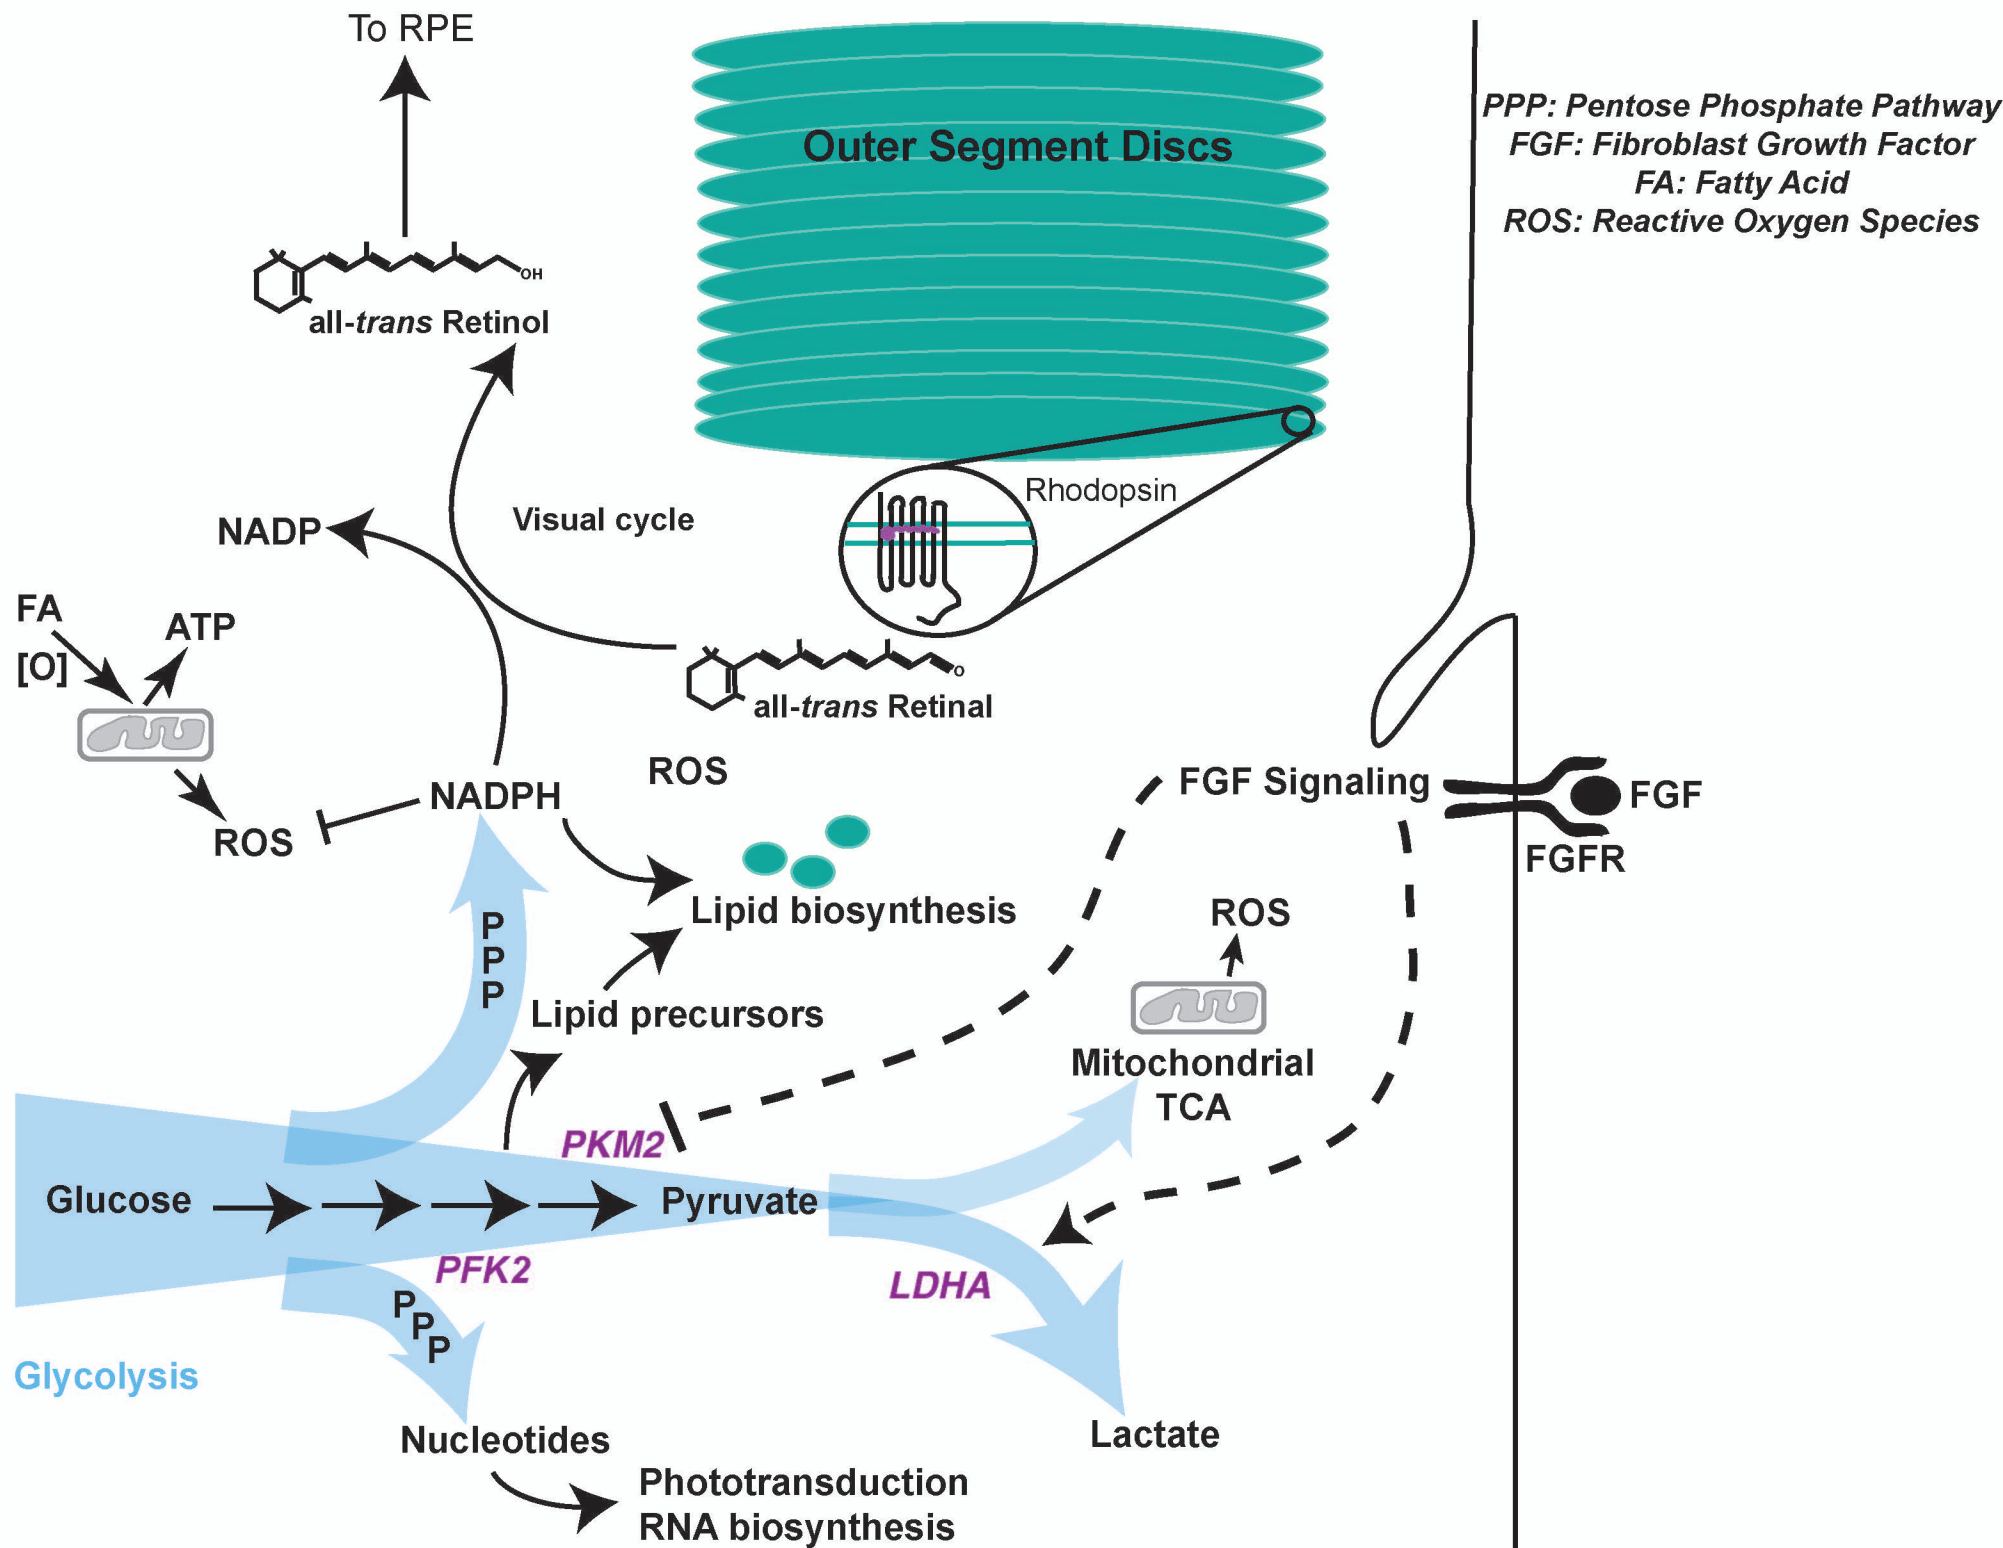

Supplement: supp [file elife_poa_e25946_Figure_4_figure_supplement_1.pdf › elife_poa_e25946_Figure_4_figure_supplement_1.pdf]
